# Supplementary material for: What Motivates Consumer Food Safety Perceptions and Beliefs? A Scoping Review in BRICS Countries
Source: MDPI journal article supplement (doi:10.3390/foods11030432), 2022-02-01
Supplement: s1 [file s1]

Table S1 - Selected studies including authors, title, country, and year.

|       | Author                   | Title                                                                                                                                 | Year | Country                                                                                               |
|-------|--------------------------|---------------------------------------------------------------------------------------------------------------------------------------|------|-------------------------------------------------------------------------------------------------------|
| [85]  | Gupta, Khanna, and Gupta | A study on the street food dimensions and its effects on consumer attitude and behavioural intentions                                 | 2018 | India                                                                                                 |
| [106] | Wang and Alexander       | The factors of consumer confidence recovery after scandals in food supply chain safety                                                | 2018 | China                                                                                                 |
| [88]  | Ma and Zhang             | Analysis of Transmission Model of Consumers' Risk Perception of Food Safety based on Case Analysis                                    | 2013 | China                                                                                                 |
| [86]  | Yan et al.               | Are social embeddedness associated with food risk perception under media coverage?                                                    | 2019 | China                                                                                                 |
| [40]  | Katiyo et al.            | Assessment of safety risks associated with handling chicken as based on practices and knowledge of a group of South African consumers | 2019 | South Africa                                                                                          |
| [60]  | Zhang et al.             | Association of Internet Use with Attitudes Toward Food Safety in China: A Cross-Sectional Study                                       | 2019 | China                                                                                                 |
| [97]  | Wen et al.               | Avian Influenza-Factors Affecting Consumers' Purchase Intentions toward Poultry Products                                              | 2019 | China                                                                                                 |
| [81]  | da Fonseca and Salay     | Beef, chicken and pork consumption and consumer safety and nutritional concerns in the City of Campinas, Brazil                       | 2008 | Brazil                                                                                                |
| [58]  | Schardong et al.         | Brazilian consumers' perception of edible insects                                                                                     | 2019 | Brazil                                                                                                |
| [63]  | Auad et al.              | Brazilian Food Truck Consumers' Profile, Choices, Preferences, and Food Safety Importance Perception                                  | 2019 | Brazil                                                                                                |
| [62]  | Durán-Agüero et al.      | Characterization of street food consumption according to age, multicentric study                                                      | 2018 | Argentina, Brazil, Chile, Colombia, Costa Rica, Guatemala, Panama, Paraguay, Peru, Portugal e Uruguay |
| [87]  | Yin et al.               | Chinese consumer preferences for fresh produce: Interaction between food safety labels and brands                                     | 2018 | China                                                                                                 |
| [61]  | Liu and Niyongira        | Chinese consumers food purchasing behaviors and awareness of food safety                                                              | 2017 | China                                                                                                 |
| [72]  | Miroso, Liu, and Bremer  | Chinese consumers' perceptions of food safety cues and maximising the effectiveness of food safety communications                     | 2020 | China                                                                                                 |
| [94]  | Wang et al.              | Chinese consumers' preferences for food quality test/measurement indicators and cues of milk powder: A case of Zhengzhou, China       | 2019 | China                                                                                                 |
| [78]  | Shan et al.              | Cognitive Biases of Consumers' Risk Perception of Foodborne Diseases in China: Examining Anchoring Effect                             | 2019 | China                                                                                                 |
| [79]  | Dill et al.              | Concerns, attitudes, and opinions of meat buyers in Garanhuns, Pernambuco, Brazil                                                     | 2021 | Brazil                                                                                                |

|      |                                   |                                                                                                                                               |      |                                       |
|------|-----------------------------------|-----------------------------------------------------------------------------------------------------------------------------------------------|------|---------------------------------------|
| [74] | de Barcellos et al.               | Consumer attitudes to different pig production systems: a study from mainland China                                                           | 2013 | China                                 |
| [71] | Popova et al.                     | Consumer evaluations of food risk management in Russia                                                                                        | 2010 | Russia                                |
| [95] | Sithole, Bekker, and Mukaratirwa  | Consumer knowledge and practices to pork safety in two Taenia solium cysticercosis endemic districts in Eastern Cape Province of South Africa | 2020 | South Africa                          |
| [48] | Wang, Huang, Liang, et al.        | Consumer knowledge, risk perception and food-handling behaviors – A national survey in China                                                  | 2021 | China                                 |
|      |                                   |                                                                                                                                               |      | - France                              |
|      |                                   |                                                                                                                                               |      | - Ireland                             |
| [73] | Kher et al.                       | Consumer perceptions of risks of chemical and microbiological contaminants associated with food chains: A cross-national study                | 2013 | - Poland<br>- Brazil<br>- Netherlands |
| [42] | Behrens et al.                    | Consumer purchase habits and views on food safety: A Brazilian study                                                                          | 2010 | Brazil                                |
|      |                                   | Consumer risk perceptions concerning different consequences of                                                                                |      |                                       |
| [10] | Zanetta et al.                    | foodborne disease acquired from food consumed away from home: A case study in Brazil                                                          | 2022 | Brazil                                |
|      |                                   | Consumer's risk perception of foodborne diseases and high-risk food                                                                           |      |                                       |
| [49] | Wang et al.                       | safety practices in domestic kitchens                                                                                                         | 2019 | China                                 |
|      |                                   | Consumers' Food Safety Risk Communication on Social Media Following                                                                           |      |                                       |
| [76] | Zhu et al.                        | the Suan Tang Zi Accident: An Extended Protection Motivation Theory Perspective                                                               | 2021 | China                                 |
|      |                                   | Consumers' perception toward quality and safety of fishery products,                                                                          |      |                                       |
| [89] | Wang et al.                       | Beijing, China                                                                                                                                | 2009 | China                                 |
|      |                                   | Consumers' perceptions of quality and safety for grape products: A case                                                                       |      |                                       |
| [96] | Feng et al.                       | study in Zhejiang Province, China                                                                                                             | 2012 | China                                 |
|      |                                   | Consumers' Perspectives on Mandatory versus Voluntary Provisions of                                                                           |      |                                       |
| [43] | Ali                               | Food Safety Regulations in India                                                                                                              | 2013 | India                                 |
|      |                                   | Consumers' Social Representations of Meat Safety in Two Selected                                                                              |      |                                       |
| [9]  | Dastile, Francis, and Muchenje    | Restaurants of Raymond Mhlaba Municipality in the Eastern Cape, South Africa                                                                  | 2017 | South Africa                          |
|      |                                   | Consumers' perceptions, purchase intention, and willingness to pay a                                                                          |      |                                       |
| [50] | Zhang et al.                      | premium price for safe vegetables: A case study of Beijing, China                                                                             | 2018 | China                                 |
|      |                                   | Consumption pattern, consumer attitude and consumer perception on                                                                             |      |                                       |
| [69] | Kiran et al.                      | meat quality and safety in Southern India                                                                                                     | 2018 | India                                 |
|      |                                   | Consumption, knowledge, and food safety practices of Brazilian seafood                                                                        |      |                                       |
| [44] | Baptista, Rodrigues, and Sant'Ana | consumersConsumption, knowledge, and food safety practices of Brazilian seafood consumers                                                     | 2020 | Brazil                                |
|      |                                   | Customer's decisiveness about food safety apprehensions of dairy                                                                              |      |                                       |
| [64] | Kar and Meena                     | products: A consumer-centric approach                                                                                                         | 2019 | India                                 |
|      |                                   | Determinants of consumer food safety self-protection behavior-- an                                                                            |      |                                       |
| [70] | Wang et al.                       | analysis using grounded theory                                                                                                                | 2020 | China                                 |
|      |                                   | Does Information Pattern Affect Risk Perception of Food Safety? A                                                                             |      |                                       |
| [45] | Han and Liu                       | National Survey in China                                                                                                                      | 2018 | China                                 |

|       |                               |                                                                                                                                                          |      |        |
|-------|-------------------------------|----------------------------------------------------------------------------------------------------------------------------------------------------------|------|--------|
| [75]  | Rodrigues et al.              | Effect of the COVID-19 pandemic on food habits and perceptions: A study with Brazilians                                                                  | 2021 | Brazil |
| [77]  | Maitiniyazi and Canavari      | Exploring Chinese consumers' attitudes toward traceable dairy products: A focus group study                                                              | 2020 | China  |
| [68]  | Lai et al.                    | Factoring Chinese consumers' risk perceptions into their willingness to pay for pork safety, environmental stewardship, and animal welfare               | 2018 | China  |
| [51]  | Wu et al.                     | Factors Affecting Consumer Willingness to Pay for Certified Traceable Food in Jiangsu Province of China                                                  | 2021 | China  |
| [46]  | Wang et al.                   | Fake news or bad news? Toward an emotion-driven cognitive dissonance model of misinformation diffusion                                                   | 2020 | China  |
| [91]  | Zhou et al.                   | Fear and trust: How risk perceptions of avian influenza affect Chinese consumers' demand for chicken                                                     | 2016 | China  |
| [52]  | Yormirzoev, Teuber, and Li    | Food quality vs food patriotism: Russian consumers' preferences for cheese after the food import ban                                                     | 2019 | Russia |
| [102] | Hessel et al.                 | Food safety behavior and handling practices during purchase, preparation, storage and consumption of chicken meat and eggs                               | 2019 | Brazil |
| [47]  | Liu et al.                    | Food safety concerns and consumer preferences for food safety attributes: Evidence from China                                                            | 2020 | China  |
| [7]   | Bai et al.                    | Food safety in restaurants: The consumer perspective                                                                                                     | 2019 | China  |
| [65]  | Si, Regnier-Davies, and Scott | Food safety in urban China: Perceptions and coping strategies of residents in Nanjing                                                                    | 2017 | China  |
| [100] | Yi et al.                     | Food Safety Incident, Public Health Concern, and Risk Spillover Heterogeneity: Avian Influenza Shocks as Natural Experiments in China's Consumer Markets | 2019 | China  |
| [53]  | Dong and Li                   | Food safety issues in China: a case study of the dairy sector                                                                                            | 2015 | China  |
| [54]  | Wang et al.                   | Food safety perception and consumption decision: A positive analysis on individuals' consumer in Tianjin City                                            | 2003 | China  |
| [93]  | Yang et al.                   | Food safety risk information-seeking intention of wechat users in China                                                                                  | 2020 | China  |
| [82]  | Liao, Luo, and Zhu            | Food Safety Trust, Risk Perception, and Consumers' Response to Company Trust Repair Actions in Food Recall Crises                                        | 2020 | China  |
| [59]  | Liu and Ma                    | Food scandals, media exposure, and citizens' safety concerns: A multilevel analysis across Chinese cities                                                | 2016 | China  |
| [109] | Bai et al.                    | Hygienic food handling intention. An application of the Theory of Planned Behavior in the Chinese cultural context                                       | 2014 | China  |
| [108] | Nie et al.                    | Influence of Loss Aversion and Income Effect on Consumer Food Choice for Food Safety and Quality Labels                                                  | 2021 | China  |
| [6]   | de Andrade et al.             | Knowledge and risk perceptions of foodborne disease by consumers and food handlers at restaurants with different food safety profiles                    | 2019 | Brazil |
| [80]  | Ortega et al.                 | Modeling heterogeneity in consumer preferences for select food safety attributes in China                                                                | 2011 | China  |
| [83]  | Danelon and Salay             | Perceived physical risk and risk-reducing strategies in the consumption of raw vegetable salads in restaurants                                           | 2012 | Brazil |

|       |                            |                                                                                                                                                                                      |      |              |
|-------|----------------------------|--------------------------------------------------------------------------------------------------------------------------------------------------------------------------------------|------|--------------|
| [110] | Xu, Zheng, and Motamed     | Perceived risks and safety concerns about fluid milk among Chinese college students                                                                                                  | 2010 | China        |
| [66]  | Veeck, Veeck, and Zhao     | Perceptions of Food Safety by Urban Consumers in Nanjing, China                                                                                                                      | 2015 | China        |
| [107] | Wu et al.                  | Public risk perception of food additives and food scares. The case in Suzhou, China                                                                                                  | 2013 | China        |
| [99]  | Wang, Diao, and Tou        | Research on the Influence Mechanism of Rational Consumers' Food Safety Supervision Satisfaction                                                                                      | 2019 | China        |
| [103] | Sun                        | Research on the influencing factors of consumer food safety risk perception                                                                                                          | 2017 | China        |
| [92]  | Behrens et al.             | Social representations of safety in food services                                                                                                                                    | 2015 | Brazil       |
| [57]  | Rajkumar et al.            | Socio-demographic influences on various consumer food safety indices: an empirical study of ethnic Goan pork sausage consumers                                                       | 2021 | India        |
| [55]  | Uggioni and Salay          | Sociodemographic and knowledge influence on attitudes towards food safety certification in restaurants                                                                               | 2014 | Brazil       |
| [105] | Chen                       | The effects of different types of trust on consumer perceptions of food safety: An empirical study of consumers in Beijing Municipality, China                                       | 2013 | China        |
| [56]  | Asiegbu, Lebelo, and Tabit | The food safety knowledge and microbial hazards awareness of consumers of ready-to-eat street-vended food                                                                            | 2016 | South Africa |
| [84]  | Zhao, Deng, and Zhou       | The impact of reference effects on online purchase intention of agricultural products The moderating role of consumers' food safety consciousness                                    | 2017 | China        |
| [98]  | Liu and Zheng              | The Predictors of Consumer Behavior in Relation to Organic Food in the Context of Food Safety Incidents: Advancing Hyper Attention Theory Within an Stimulus-Organism-Response Model | 2019 | China        |
| [67]  | Maitiniyazi and Canavari   | Understanding Chinese consumers' safety perceptions of dairy products: a qualitative study                                                                                           | 2021 | China        |
| [41]  | Wang, Ge, and Ma           | Urban Chinese Consumers' Willingness to Pay for Pork with Certified Labels: A Discrete Choice Experiment                                                                             | 2018 | China        |
| [104] | Moruzzo et al.             | Urban Consumer Trust and Food Certifications in China                                                                                                                                | 2020 | China        |
| [101] | Wei-qun et al.             | Why Do Consumers Switch in Food Safety Crisis? A View of Regulatory Focus Theory                                                                                                     | 2015 | China        |

Table S2 – Synthesis table of motivators and effects of “socioeconomic” category

| Motivator | Observed effect                                                                                                 | Hazard                            | Country      | Study title                                                                                                                                         | Year |
|-----------|-----------------------------------------------------------------------------------------------------------------|-----------------------------------|--------------|-----------------------------------------------------------------------------------------------------------------------------------------------------|------|
| Sex       | Females had a greater perception of food safety                                                                 | GMO                               | China        | Food safety perception and consumption decision: A positive analysis on individuals' consumer in Tianjin City                                       | 2003 |
|           |                                                                                                                 | None                              | China        | Food scandals, media exposure, and citizens' safety concerns: A multilevel analysis across Chinese cities                                           | 2016 |
|           | Females trust more government information on food safety                                                        | Chemical, Biological, GMO Hazards | China        | Perceptions of Food Safety by Urban Consumers in Nanjing, China                                                                                     | 2015 |
|           | Males rely more on food safety information online                                                               | Chemical, Biological, GMO Hazards | China        | Perceptions of Food Safety by Urban Consumers in Nanjing, China                                                                                     | 2015 |
|           | Males underestimates more the risks of food contamination by chemicals and microorganisms                       | Food contamination                | Brazil       | Consumer purchase habits and views on food safety: A Brazilian study                                                                                | 2010 |
|           | Male sex has increased risk perception for consequences of Foodborne disease associated with financial issues   | Foodborne disease                 | Brazil       | Consumer risk perceptions concerning different consequences of Foodborne disease acquired from food consumed away from home: A case study in Brazil | 2022 |
|           | Women reported following more safe practices                                                                    | Foodborne disease - Raw chicken   | South Africa | Assessment of safety risks associated with handling chicken as based on practices and knowledge of a group of South African consumers               | 2019 |
|           | Men and rural residents had higher assessments regarding food safety                                            | None                              | China        | Association of Internet Use with Attitudes Toward Food Safety in China: A Cross-Sectional Study                                                     | 2019 |
|           | Male consumers have a significant positive relationship with the voluntary mechanism for regulating food safety | Regulation                        | India        | Consumers' Perspectives on Mandatory versus Voluntary Provisions of Food Safety Regulations in India                                                | 2013 |
|           | Consumers who are responsible for the diet of families are more sensitive to food safety                        | Foodborne disease in meat         | South Africa | Consumers' Social Representations of Meat Safety in Two Selected Restaurants of Raymond Mhlaba Municipality in the Eastern Cape, South Africa       | 2017 |
|           | Male respondents have a higher relative risk when compared to females (they are                                 | Seafood                           | Brazil       | Consumption, knowledge, and food safety practices of Brazilian seafood consumers                                                                    | 2020 |

|               |                                                                                                                                                         |                                 |              |                                                                                                           |      |
|---------------|---------------------------------------------------------------------------------------------------------------------------------------------------------|---------------------------------|--------------|-----------------------------------------------------------------------------------------------------------|------|
|               | more likely to thaw seafood at room temperature)                                                                                                        |                                 |              |                                                                                                           |      |
|               | Male respondents are more likely to wash their hands only with water, believing that the chances of getting sick due to raw seafood consumption are low | Seafood                         | Brazil       | Consumption, knowledge, and food safety practices of Brazilian seafood consumers                          | 2020 |
|               | Male respondents are less likely to have heard about Vibrio, Listeria, and Salmonella as bacterial pathogens potentially present in seafood             | Seafood                         | Brazil       | Consumption, knowledge, and food safety practices of Brazilian seafood consumers                          | 2020 |
|               | Females had a higher perception of risk                                                                                                                 | Seafood                         | Brazil       | Consumption, knowledge, and food safety practices of Brazilian seafood consumers                          | 2020 |
|               | Females are more susceptible to food safety misinformation                                                                                              | Dissemination of misinformation | China        | Fake news or bad news? Toward an emotion-driven cognitive dissonance model of misinformation diffusion    | 2020 |
|               | Females are more concerned about shelf life, food color and nutritional content                                                                         | Foodborne disease - awareness   | China        | Chinese consumers food purchasing behaviors and awareness of food safety                                  | 2017 |
|               | Females are better at knowing the processing of leftovers and thawing raw meat                                                                          | Foodborne disease               | China        | Consumer knowledge, risk perception and food-handling behaviors – A national survey in China              | 2021 |
| <b>Gender</b> | Gender affects how consumers perceive the safety of food sold on the street                                                                             | Microbiological Hazard          | South Africa | The food safety knowledge and microbial hazards awareness of consumers of ready-to-eat street-vended food | 2016 |
|               | Gender is not significantly correlated with perception of risk to food safety                                                                           | Sources of risk information     | China        | Does Information Pattern Affect Risk Perception of Food Safety?_The National Survey in China              | 2018 |
| <b>Race</b>   | Race affects how consumers perceive the safety of food sold on the street                                                                               | Microbiological Hazard          | South Africa | The food safety knowledge and microbial hazards awareness of consumers of ready-to-eat street-vended food | 2016 |
| <b>Age</b>    | The older the age, the greater the perception of eating risk                                                                                            | None                            | China        | Food scandals, media exposure, and citizens' safety concerns: A multilevel analysis across Chinese cities | 2016 |
|               | The lower the age, the lower the positive attitude towards restaurant certification                                                                     | Restaurant certification        | Brazil       | Sociodemographic and knowledge influence on attitudes towards food safety certification in restaurants    | 2014 |

|                                                                                                                                                                                 |                                 |              |                                                                                                                                       |      |
|---------------------------------------------------------------------------------------------------------------------------------------------------------------------------------|---------------------------------|--------------|---------------------------------------------------------------------------------------------------------------------------------------|------|
| The youngest (18–29 years) have riskier practices                                                                                                                               | Foodborne disease - raw chicken | South Africa | Assessment of safety risks associated with handling chicken as based on practices and knowledge of a group of South African consumers | 2019 |
| The youngest (18-29 years) showed that they had much less knowledge than respondents in other age groups, except those aged 30-39 years                                         | Foodborne disease - raw chicken | South Africa | Assessment of safety risks associated with handling chicken as based on practices and knowledge of a group of South African consumers | 2019 |
| Age predicted better practices and knowledge than gender and level of education                                                                                                 | Foodborne disease - raw chicken | South Africa | Assessment of safety risks associated with handling chicken as based on practices and knowledge of a group of South African consumers | 2019 |
| Younger consumers emphasize experience attributes (search attributes = evaluates food safety and quality attributes at the time of consumption).                                | Regulation                      | India        | Consumers' Perspectives on Mandatory versus Voluntary Provisions of Food Safety Regulations in India                                  | 2013 |
| Age positively correlates with voluntary (factor) mechanism for regulating food safety.                                                                                         | Regulation                      | India        | Consumers' Perspectives on Mandatory versus Voluntary Provisions of Food Safety Regulations in India                                  | 2013 |
| Generations X, Y, and Z are more likely to consume raw or undercooked seafood                                                                                                   | Seafood                         | Brazil       | Consumption, knowledge, and food safety practices of Brazilian seafood consumers                                                      | 2020 |
| Generations X and Y are more likely to believe that they are unlikely to get older from raw seafood consumption                                                                 | Seafood                         | Brazil       | Consumption, knowledge, and food safety practices of Brazilian seafood consumers                                                      | 2020 |
| Generation Z is more likely to wash hands only with water                                                                                                                       | Seafood                         | Brazil       | Consumption, knowledge, and food safety practices of Brazilian seafood consumers                                                      | 2020 |
| The source of information for knowledge about food items changes according to age. Adults and young people search cookbooks and older people seek information from food experts | Milk and Dairy                  | India        | Customer's decisiveness about food safety apprehensions of dairy products: A consumer-centric approach                                | 2019 |
| Young urban consumers (with higher education) tend to                                                                                                                           | Sources of risk information     | China        | Does Information Pattern Affect Risk Perception of Food Safety?_The National Survey in China                                          | 2018 |

|               |                                                                                                                                                 |                                 |              |                                                                                                               |      |
|---------------|-------------------------------------------------------------------------------------------------------------------------------------------------|---------------------------------|--------------|---------------------------------------------------------------------------------------------------------------|------|
|               | perceive a higher level of risk concerning food safety                                                                                          |                                 |              |                                                                                                               |      |
|               | Younger people (25 years or younger) and the elderly (over 65 years) are more susceptible to misinformation in food safety                      | Dissemination of misinformation | China        | Fake news or bad news? Toward an emotion-driven cognitive dissonance model of misinformation diffusion        | 2020 |
|               | Middle-aged and older people are more concerned about the fuji apple                                                                            | Fuji Apple                      | China        | Food safety concerns and consumer preferences for food safety attributes: Evidence from China                 | 2020 |
|               | Age increases the perception linked to food dirt, and perception linked to partially cleaned foods decreases                                    | Foodborne disease - street food | Brazil       | Characterization of street food consumption according to age, multicentric study                              | 2018 |
|               | Consumer susceptibility to improper processing of leftovers and thawing raw meat increases with increasing age                                  | Foodborne disease               | China        | Consumer knowledge, risk perception and food-handling behaviors – A national survey in China                  | 2021 |
|               | The younger age group ( $\leq 30$ ) has a greater perception of the importance of food safety, and older people ( $\geq 50$ ), lower perception | Foodborne disease - Food truck  | Brazil       | Brazilian Food Truck Consumers' Profile, Choices, Preferences, and Food Safety Importance Perception          | 2019 |
| <b>Income</b> | The higher income, the greater the perception of food safety                                                                                    | GMO                             | China        | Food safety perception and consumption decision: A positive analysis on individuals' consumer in Tianjin City | 2003 |
|               | The higher the income, the lower the importance of restaurant certification                                                                     | Restaurant certification        | Brazil       | Sociodemographic and knowledge influence on attitudes towards food safety certification in restaurants        | 2014 |
|               | Monthly income affects how consumers perceive the safety of food sold on the street                                                             | Microbiological Hazard          | South Africa | The food safety knowledge and microbial hazards awareness of consumers of ready-to-eat street-vended food     | 2016 |
|               | The higher the income, the higher the provision of payment for certified products                                                               | Certified pork                  | China        | Urban Chinese Consumers' Willingness to Pay for Pork with Certified Labels: A Discrete Choice Experiment      | 2018 |
|               | Housewives in the higher income group seem to prefer frozen chicken as a way to ensure food safety                                              | Food contamination              | Brazil       | Consumer purchase habits and views on food safety: A Brazilian study                                          | 2010 |



|                                                                                                                                                                                                                           |                            |              |                                                                                                                                               |      |
|---------------------------------------------------------------------------------------------------------------------------------------------------------------------------------------------------------------------------|----------------------------|--------------|-----------------------------------------------------------------------------------------------------------------------------------------------|------|
| High-income (generally highly educated) groups have a higher perception of foodborne disease risk and are more skilled and faster at researching and mastering food safety knowledge                                      | Foodborne disease          | China        | Consumer's risk perception of Foodborne diseases and high-risk food safety practices in domestic kitchens                                     | 2019 |
| Consumers with higher monthly income emphasize the shape/size, color and variety of food products as an attribute of food quality and safety.                                                                             | Regulation                 | India        | Consumers' Perspectives on Mandatory versus Voluntary Provisions of Food Safety Regulations in India                                          | 2013 |
| Consumers with higher monthly income and consumers who have wage-earners emphasize credit attributes (credence attributes = evaluation of food quality and safety attributes by regulatory certifications and practices). | Regulation                 | India        | Consumers' Perspectives on Mandatory versus Voluntary Provisions of Food Safety Regulations in India                                          | 2013 |
| High-income consumers are more aware of food safety                                                                                                                                                                       | Foodborne disease in meats | South Africa | Consumers' Social Representations of Meat Safety in Two Selected Restaurants of Raymond Mhlaba Municipality in the Eastern Cape, South Africa | 2017 |
| Family income had a significant positive influence on the willingness to pay for a premium price, but not on the intention to purchase safe vegetables.                                                                   | Vegetables                 | China        | Consumers' perceptions, purchase intention, and willingness to pay a premium price for safe vegetables: A case study of Beijing, China        | 2018 |
| High-income consumers are more likely to consume raw or undercooked seafood                                                                                                                                               | Seafood                    | Brazil       | Consumption, knowledge, and food safety practices of Brazilian seafood consumers                                                              | 2020 |
| Consumer income has a significant positive effect on the frequency of seafood consumption                                                                                                                                 | Seafood                    | Brazil       | Consumption, knowledge, and food safety practices of Brazilian seafood consumers                                                              | 2020 |
| Higher middle-income citizens spend more time transporting seafood                                                                                                                                                        | Seafood                    | Brazil       | Consumption, knowledge, and food safety practices of Brazilian seafood consumers                                                              | 2020 |

|                                                                                                                                                                                                                                                            |                                 |        |                                                                                                         |      |
|------------------------------------------------------------------------------------------------------------------------------------------------------------------------------------------------------------------------------------------------------------|---------------------------------|--------|---------------------------------------------------------------------------------------------------------|------|
| Household income is not significantly correlated with the perception of risk to food safety                                                                                                                                                                | Sources of risk information     | China  | Does Information Pattern Affect Risk Perception of Food Safety?_The National Survey in China            | 2018 |
| Income has a significant effect on the willingness to pay a maximum amount in traceable foods                                                                                                                                                              | Food traceability               | China  | Factors Affecting Consumer Willingness to Pay for Certified Traceable Food in Jiangsu Province of China | 2021 |
| Low-income people are more susceptible to misinformation in food safety                                                                                                                                                                                    | Dissemination of misinformation | China  | Fake news or bad news? Toward an emotion-driven cognitive dissonance model of misinformation diffusion  | 2020 |
| With increased income individuals are less likely to prefer internally produced cheeses for quality preference reasons primarily, but also for economic reasons                                                                                            | National x imported cheese      | Russia | Food quality vs food patriotism: Russian consumers' preferences for cheese after the food import ban    | 2018 |
| People with higher family income are more concerned about fuji apple choices                                                                                                                                                                               | Apple fuji                      | China  | Food safety concerns and consumer preferences for food safety attributes: Evidence from China           | 2020 |
| Reflection on the dairy safety incident of relatively low-income groups is more intense than in high-income groups, and the decrease in consumption of low-income groups is more expected after incidents with milk safety                                 | Dairy                           | China  | Food safety issues in China: a case study of the dairy sector                                           | 2015 |
| Income had significant effects on knowledge, risk perception and normative frequency of raw meat thawing but did not affect the processing of leftovers                                                                                                    | Foodborne disease               | China  | Consumer knowledge, risk perception and food-handling behaviors – A national survey in China            | 2021 |
| Average monthly household income between 3001 and 5,000 Yuan attach the greatest importance to the perception of risk of thawing raw meat, while consumers with average monthly household income below 1000 Chinese Yuan are the weakest in the perception | Foodborne disease               | China  | Consumer knowledge, risk perception and food-handling behaviors – A national survey in China            | 2021 |

|                        |                                                                                                                                                                          |                                 |              |                                                                                                                                               |      |
|------------------------|--------------------------------------------------------------------------------------------------------------------------------------------------------------------------|---------------------------------|--------------|-----------------------------------------------------------------------------------------------------------------------------------------------|------|
|                        | of risk of improper handling of raw meat.                                                                                                                                |                                 |              |                                                                                                                                               |      |
| <b>Education level</b> | The higher education, the greater the perception of food safety                                                                                                          | GMO                             | China        | Food safety perception and consumption decision: A positive analysis on individuals' consumer in Tianjin City                                 | 2003 |
|                        | The higher the schooling, the greater the concern with food safety                                                                                                       | None                            |              | Food scandals, media exposure, and citizens' safety concerns: A multilevel analysis across Chinese cities                                     | 2016 |
|                        | The higher the education, the higher the KABPI (knowledge, attitudes, beliefs, practices index)                                                                          | Goan pork sausage               | China        | Socio-demographic influences on various consumer food safety indices: an empirical study of ethnic Goan pork sausage consumers                | 2021 |
|                        | The higher the schooling, the lower the importance of restaurant certification                                                                                           | Restaurant certification        | Brazil       | Sociodemographic and knowledge influence on attitudes towards food safety certification in restaurants                                        | 2014 |
|                        | Schooling affects how consumers perceive the safety of food sold on the street                                                                                           | Microbiological Hazard          | South Africa | The food safety knowledge and microbial hazards awareness of consumers of ready-to-eat street-vended food                                     | 2016 |
|                        | The higher the schooling, the higher the provision of payment for certified products                                                                                     | Certified pork                  | China        | Urban Chinese Consumers' Willingness to Pay for Pork with Certified Labels: A Discrete Choice Experiment                                      | 2018 |
|                        | The higher the schooling, the better informed the factors that affect the safety of chicken meat                                                                         | Foodborne disease - raw chicken | South Africa | Assessment of safety risks associated with handling chicken as based on practices and knowledge of a group of South African consumers         | 2019 |
|                        | The higher the schooling, the greater the concern with food safety                                                                                                       |                                 | China        | Association of Internet Use with Attitudes Toward Food Safety in China: A Cross-Sectional Study                                               | 2019 |
|                        | More educated consumers emphasize credit attributes (credence attributes = evaluation of food quality and safety attributes by regulatory certifications and practices). | Regulation                      | India        | Consumers' Perspectives on Mandatory versus Voluntary Provisions of Food Safety Regulations in India                                          | 2013 |
|                        | High-level educational consumers are more aware of food safety                                                                                                           | Foodborne disease in meats      | South Africa | Consumers' Social Representations of Meat Safety in Two Selected Restaurants of Raymond Mhlaba Municipality in the Eastern Cape, South Africa | 2017 |
|                        | Graduate consumers are more likely to consume raw or undercooked seafood                                                                                                 | Seafood                         | Brazil       | Consumption, knowledge, and food safety practices of Brazilian seafood consumers                                                              | 2020 |

|                                                                                                                                                                       |                                 |        |                                                                                                         |      |
|-----------------------------------------------------------------------------------------------------------------------------------------------------------------------|---------------------------------|--------|---------------------------------------------------------------------------------------------------------|------|
| Graduate students are more likely to have heard of Vibrio and Listeria as foodborne pathogens                                                                         | Seafood                         | Brazil | Consumption, knowledge, and food safety practices of Brazilian seafood consumers                        | 2020 |
| Schooling has a significant effect on the willingness to pay a premium amount in traceable foods                                                                      | Food traceability               | China  | Factors Affecting Consumer Willingness to Pay for Certified Traceable Food in Jiangsu Province of China | 2021 |
| People with less education are more susceptible to misinformation in food safety                                                                                      | Dissemination of misinformation | China  | Fake news or bad news? Toward an emotion-driven cognitive dissonance model of misinformation diffusion  | 2020 |
| With increased education, individuals are less likely to prefer in-house produced cheeses for quality preference reasons primarily, but also economic reasons         | National x imported cheese      | Russia | Food quality vs food patriotism: Russian consumers' preferences for cheese after the food import ban    | 2018 |
| More educated people are more concerned about the choices of the fuji apple                                                                                           | Apple fuji                      | China  | Food safety concerns and consumer preferences for food safety attributes: Evidence from China           | 2020 |
| People with a higher level of education (graduate) believe that insect consumption is safe                                                                            | Safety of insect consumption    | Brazil | Brazilian consumers' perception of edible insects                                                       | 2019 |
| lower levels of education affect consumers' knowledge and the type of concern for food safety                                                                         | Foodborne disease - awareness   | China  | Chinese consumers food purchasing behaviors and awareness of food safety                                | 2017 |
| concerns related to product life also differed among respondents with different levels of education                                                                   | Foodborne disease - awareness   | China  | Chinese consumers food purchasing behaviors and awareness of food safety                                | 2017 |
| The higher the level of education, the higher the score of consumers' knowledge about the processing of leftovers and thawing of raw meat.                            | Foodborne disease               | China  | Consumer knowledge, risk perception and food-handling behaviors – A national survey in China            | 2021 |
| The higher the educational level, the higher the perceived severity concerning the incorrect handling of raw meat; less likely to believe that improper processing of | Foodborne disease               | China  | Consumer knowledge, risk perception and food-handling behaviors – A national survey in China            | 2021 |

|                           |                                                                                                                                                                                           |                                |        |                                                                                                                                                                   |      |
|---------------------------|-------------------------------------------------------------------------------------------------------------------------------------------------------------------------------------------|--------------------------------|--------|-------------------------------------------------------------------------------------------------------------------------------------------------------------------|------|
|                           | leftovers would lead to adverse consequences;                                                                                                                                             |                                |        |                                                                                                                                                                   |      |
|                           | The lower the level of education, the less likely to adopt a normative leftovers processing behavior                                                                                      | Foodborne disease              | China  | Consumer knowledge, risk perception and food-handling behaviors – A national survey in China                                                                      | 2021 |
|                           | the level of education does not affect the perceived susceptibility and normative frequency of thawing of raw meat.                                                                       | Foodborne disease              | China  | Consumer knowledge, risk perception and food-handling behaviors – A national survey in China                                                                      | 2021 |
| <b>Family composition</b> | Consumers who have children or elderly people at home to express more concern about the safety and quality of food in dairy products                                                      | dairy products                 | China  | Understanding Chinese consumers' safety perceptions of dairy products: a qualitative study                                                                        | 2021 |
|                           | Consumers who have more children in the family place more emphasis on experience attributes (search attributes = assesses food safety and quality attributes at the time of consumption). | regulation                     | India  | Consumers' Perspectives on Mandatory versus Voluntary Provisions of Food Safety Regulations in India                                                              | 2013 |
|                           | If the family has children under 18, the intention to buy safe vegetables increases                                                                                                       | Vegetables                     | China  | Consumers' perceptions, purchase intention, and willingness to pay a premium price for safe vegetables: A case study of Beijing, China                            | 2018 |
|                           | Families without children are more likely to consume raw or undercooked seafood                                                                                                           | Seafood                        | Brazil | Consumption, knowledge, and food safety practices of Brazilian seafood consumers Consumption, knowledge, and food safety practices of Brazilian seafood consumers | 2020 |
|                           | The presence of children in the family affects the perception of risk of seafood and safety practices                                                                                     | Seafood                        | Brazil | Consumption, knowledge, and food safety practices of Brazilian seafood consumers Consumption, knowledge, and food safety practices of Brazilian seafood consumers | 2020 |
|                           | Family size is not significantly correlated with perceived food safety risk                                                                                                               | Risk information sources       | China  | Does Information Pattern Affect Risk Perception of Food Safety? The National Survey in China                                                                      | 2018 |
|                           | childless consumers getting higher perception scores of the importance of food safety                                                                                                     | Foodborne disease - Food truck | Brazil | Brazilian Food Truck Consumers' Profile, Choices, Preferences, and Food Safety Importance Perception                                                              | 2019 |



Table S3 - Motivators and effects of “cognitive aspects” category

| Motivator       | Observed effect                                                                                                                                                                                       | Hazard                                                | Country | Study title                                                                                                                                       | Year |
|-----------------|-------------------------------------------------------------------------------------------------------------------------------------------------------------------------------------------------------|-------------------------------------------------------|---------|---------------------------------------------------------------------------------------------------------------------------------------------------|------|
| Risk Perception | The greater the perception of risk, the greater the search for information on food safety risk                                                                                                        | None                                                  | China   | Food safety risk information-seeking intention of wechat users in China                                                                           | 2020 |
|                 |                                                                                                                                                                                                       | None                                                  | China   | Food Safety Trust, Risk Perception, and Consumers' Response to Company Trust Repair Actions in Food Recall Crises                                 | 2020 |
|                 | The greater the perception of risk, the greater the protective behavioral intention                                                                                                                   | None                                                  | China   | Food Safety Trust, Risk Perception, and Consumers' Response to Company Trust Repair Actions in Food Recall Crises                                 | 2020 |
|                 | The greater the perception of food safety risk, the less willing to pay                                                                                                                               | foodborne disease                                     | China   | The meta-analytic review of food safety risk perception                                                                                           | 2020 |
|                 | The perception of food safety risk is influenced by subjective characteristics (perceived control, concern, perceived benefit, preference for natural foods) and not by the initial negative attitude | foodborne disease                                     | China   | The meta-analytic review of food safety risk perception                                                                                           | 2020 |
|                 | The lower the risk perception, the greater the intention to choose high-risk restaurants for Foodborne disease                                                                                        | foodborne disease                                     | Brazil  | Knowledge and risk perceptions of Foodborne disease by consumers and food handlers at restaurants with different food safety profiles             | 2019 |
|                 | Consumers with moderate risk perception seek strategies to reduce risk                                                                                                                                | Salads and raw vegetables at full-service restaurants | Brazil  | Perceived physical risk and risk-reducing strategies in the consumption of raw vegetable salads in restaurants                                    | 2012 |
|                 | Greater perception of risk associated with the safety of meat products                                                                                                                                | food contamination                                    | Brazil  | Consumer purchase habits and views on food safety: A Brazilian study                                                                              | 2010 |
|                 | The high risk perception in relation to the consumption of vegetables and meat seems to justify extreme - and sometimes inappropriate - behaviors applied to improve the level of safety              | food contamination                                    | Brazil  | Consumer purchase habits and views on food safety: A Brazilian study                                                                              | 2010 |
|                 | Low risk perception in home environments                                                                                                                                                              | food contamination                                    | Brazil  | Consumer purchase habits and views on food safety: A Brazilian study                                                                              | 2010 |
|                 | Risk perception has a mediating role in the relationships in the degree of influence of Reference Groups and online comments in the process of                                                        | Purchase of agricultural products                     | China   | The impact of reference effects on online purchase intention of agricultural products The moderating role of consumers' food safety consciousness | 2017 |

|                                                                                                                                                                                 |                                          |              |                                                                                                                                                                   |      |  |
|---------------------------------------------------------------------------------------------------------------------------------------------------------------------------------|------------------------------------------|--------------|-------------------------------------------------------------------------------------------------------------------------------------------------------------------|------|--|
| making the purchase decision                                                                                                                                                    |                                          |              |                                                                                                                                                                   |      |  |
| Low risk perception in restaurants                                                                                                                                              | foodborne disease                        | Brazil       | Consumer risk perceptions concerning different consequences of Foodborne disease acquired from food consumed away from home: A case study in Brazil               | 2022 |  |
| The perception of risk is responsible for the change in attitude towards street food                                                                                            |                                          |              |                                                                                                                                                                   |      |  |
| Hygienic risk was the most critical perceived risk                                                                                                                              | Street food                              | India        | A study on the street food dimensions and its effects on consumer attitude and behavioral intentions                                                              | 2018 |  |
| Consumers can develop a negative perception and perceive the health risk                                                                                                        |                                          |              |                                                                                                                                                                   |      |  |
| The path (in chain, radiation, chain with radiation and migration) of transmission of risk perception to food safety, leads to the speed of rapid diffusion of risk perception; | food safety risk transmission perception | China        | Analysis of Transmission Model of Consumers' Risk Perception of Food Safety based on Case Analysis                                                                | 2013 |  |
| Improved risk perception through increased government credibility, transparency of information and advertising, and improved risk awareness about food safety.                  | food safety risk transmission perception | China        | Analysis of Transmission Model of Consumers' Risk Perception of Food Safety based on Case Analysis                                                                | 2013 |  |
| Incorrect perception of the risks associated with fishery products                                                                                                              | fishing products                         | China        | Consumers' perception toward quality and safety of fishery products, Beijing, China                                                                               | 2009 |  |
| Risk perceptions can directly affect consumer decision-making behavior                                                                                                          | foodborne disease in meat                | South Africa | Consumers' Social Representations of Meat Safety in Two Selected Restaurants of Raymond Mhlaba Municipality in the Eastern Cape, South Africa                     | 2017 |  |
| Low risk perception about the probability of becoming ill due to the consumption of raw seafood                                                                                 | Seafood                                  | Brazil       | Consumption, knowledge, and food safety practices of Brazilian seafood consumers Consumption, knowledge, and food safety practices of Brazilian seafood consumers | 2020 |  |
| Perceptions of risk in food safety lead to greater willingness to pay. Food safety is the attribute that has the highest premium value accepted by consumers                    | Pig meat                                 | China        | Factoring Chinese consumers' risks perceptions into their willingness to pay for pork safety, environmental stewardship, and animal welfare                       | 2018 |  |
| Risk perception has significant effect on                                                                                                                                       | food traceability                        | China        | Factors Affecting Consumer Willingness to Pay for Certified                                                                                                       | 2021 |  |



|                                                                                                                                                                                                                              |                                                |       |                                                                                                       |      |
|------------------------------------------------------------------------------------------------------------------------------------------------------------------------------------------------------------------------------|------------------------------------------------|-------|-------------------------------------------------------------------------------------------------------|------|
| willingness to pay a premium on traceable food                                                                                                                                                                               |                                                |       | Traceable Food in Jiangsu Province of China                                                           |      |
| the more consumers believe that the purchase of chicken products is a risk to some extent during the avian flu period, the more they will reduce their purchase of chicken products.                                         | Purchase intention during the Avian Flu period | China | Avian Influenza-Factors Affecting Consumers' Purchase Intentions toward Poultry Products              | 2019 |
| The perception of risk has generally led to decreased demand and increased willingness to pay                                                                                                                                | Chicken                                        | China | Fear and trust: How risks perceptions of avian influenza affect Chinese consumers' demand for chicken | 2016 |
| Residents felt vulnerable and exposed to threats from unsafe food from the production phase of food supply chains to the food processing, preparation and retail phases.                                                     | Perception about food safety condition         | China | Food safety in urban China: Perceptions and coping strategies of residents in Nanjing                 | 2017 |
| Pork and vegetables were considered the least safe food                                                                                                                                                                      | Perception about food safety condition         | China | Food safety in urban China: Perceptions and coping strategies of residents in Nanjing                 | 2017 |
| Risk perception is impacted by relationship levels (interpersonal, organizational and social);                                                                                                                               | Traceability system - food safety problem      | China |                                                                                                       | 2019 |
| the social relationship has a significant effect on the risk perception of the group with negative information                                                                                                               | Traceability system - food safety problem      | China |                                                                                                       | 2019 |
| Risk perception: for respondents in the negative group, offline social interactions could mitigate the way the public perceives dietary risk, although this influence was weaker than trust, positive emotions and knowledge | Traceability system - food safety problem      | China | Are social embeddedness associated with food risk perception under media coverage?                    | 2019 |
| Risk perception: for respondents in the positive group, interpersonal relationships, social networks and positive emotions can effectively alleviate the risk perception of the results                                      | Traceability system - food safety problem      | China |                                                                                                       | 2019 |
| consumers with different levels of food safety risk perception had dramatically                                                                                                                                              | WTB based on food safety perception            | China | Chinese consumer preferences for fresh produce: Interaction between food safety labels and brands     | 2018 |

|                                  |                                                                                                                                                   |                                            |              |                                                                                                                                                     |      |
|----------------------------------|---------------------------------------------------------------------------------------------------------------------------------------------------|--------------------------------------------|--------------|-----------------------------------------------------------------------------------------------------------------------------------------------------|------|
|                                  | different perceptions of WTP for the various labels                                                                                               |                                            |              |                                                                                                                                                     |      |
|                                  | Consumers' willingness to pay for safer food had a slight correlation with perceptions of risk.                                                   | foodborne disease                          | Brazil       | Consumer risk perceptions concerning different consequences of Foodborne disease acquired from food consumed away from home: A case study in Brazil | 2022 |
|                                  | Participants believe they are less likely than other participants to eat foods that are unsafe                                                    | Certified products                         | China        | Optimistic Bias, Food Safety Cognition, and Consumer Behavior of College Students in Taiwan and Mainland China                                      | 2020 |
|                                  |                                                                                                                                                   | Low-cost street food or food services      | Brazil       | Social representations of safety in food services                                                                                                   | 2015 |
|                                  | Consumers believe their risk of having a Foodborne disease is lower than other consumers                                                          | foodborne disease                          | Brazil       | Knowledge and risk perceptions of Foodborne disease by consumers and food handlers at restaurants with different food safety profiles               | 2019 |
|                                  | Participants feel in control of their food handling practices, minimizing their personal perception of risk in the home environment.              | food contamination                         | Brazil       | Consumer purchase habits and views on food safety: A Brazilian study                                                                                | 2010 |
| <b>Social pressure</b>           | The greater the social pressure, the greater the search for information on food safety risks                                                      | None                                       | China        | Food safety risk information-seeking intention of wechat users in China                                                                             | 2020 |
| <b>Confidence in Food Safety</b> | The higher the level of confidence in food safety, the lower the risk perception                                                                  | None                                       | China        | Food Safety Trust, Risk Perception, and Consumers' Response to Company Trust Repair Actions in Food Recall Crises                                   | 2020 |
|                                  | The higher the level of confidence in food safety, the lower the protective behavioral intention                                                  | None                                       | China        | Food Safety Trust, Risk Perception, and Consumers' Response to Company Trust Repair Actions in Food Recall Crises                                   | 2020 |
|                                  | Greater confidence in guaranteeing security in supermarkets, when compared to open markets.                                                       | food contamination                         | Brazil       | Consumer purchase habits and views on food safety: A Brazilian study                                                                                | 2010 |
|                                  | Distrust of packaged and frozen meat cuts found in supermarkets                                                                                   | food contamination                         | Brazil       | Consumer purchase habits and views on food safety: A Brazilian study                                                                                | 2010 |
|                                  | When asked whether information about safety, length of the food chain and traceability would increase their confidence, they responded positively | Chemical and microbiological contamination | Brazil       | Consumer perceptions of chemical and microbiological contaminants associated with food chains: A cross-national study                               | 2011 |
|                                  | Confidence in the safety of street foods does not affect the preference for these foods.                                                          | Microbiological Hazard                     | South Africa | The food safety knowledge and microbial hazards awareness of consumers of ready-to-eat street-sold food                                             | 2016 |

|                                  |                                                                                                                                                    |                                          |       |                                                                                                           |      |
|----------------------------------|----------------------------------------------------------------------------------------------------------------------------------------------------|------------------------------------------|-------|-----------------------------------------------------------------------------------------------------------|------|
|                                  | Believing that a brand is less secure can cause consumers to switch brands                                                                         | food supply chain                        | China | The factors of consumer confidence recovery after scandals in the food supply chain safety                | 2018 |
| <b>Media exposure</b>            | The greater the exposure to the media, the greater the concern with food safety                                                                    | None                                     | China | Food scandals, media exposure, and citizens' safety concerns: A multilevel analysis across Chinese cities | 2016 |
|                                  | Media coverage plays an important role in people's perception of dietary risk after a major food scare                                             | dairy products                           | China | Understanding Chinese consumers' safety perceptions of dairy products: a qualitative study                | 2021 |
|                                  | Negative correlation between internet use and gender and urban and rural dwellers (most vulnerable to negative information)                        | None                                     | China | Association of Internet Use with Attitudes Toward Food Safety in China: A Cross-Sectional Study           | 2019 |
|                                  | Internet users were more likely to have a lower food safety rating                                                                                 | None                                     | China | Association of Internet Use with Attitudes Toward Food Safety in China: A Cross-Sectional Study           | 2019 |
|                                  | Internet users are more likely to have a lower food safety rating                                                                                  | None                                     | China | Association of Internet Use with Attitudes Toward Food Safety in China: A Cross-Sectional Study           | 2019 |
|                                  | Internet use and food safety assessment was significantly different among people of different ages                                                 | None                                     | China | Association of Internet Use with Attitudes Toward Food Safety in China: A Cross-Sectional Study           | 2019 |
|                                  | increased frequency of use of the Internet to search for news, search for information, and browse Weibo lowers people's assessments of food safety | None                                     | China | Association of Internet Use with Attitudes Toward Food Safety in China: A Cross-Sectional Study           | 2019 |
|                                  | the more doubts people had about the information on the Internet or the opinions of internet users, the greater their assessment of food safety    | None                                     | China | Association of Internet Use with Attitudes Toward Food Safety in China: A Cross-Sectional Study           | 2019 |
|                                  | Internet use had a greater negative impact on people who did not have a rational view of network information                                       | None                                     | China | Association of Internet Use with Attitudes Toward Food Safety in China: A Cross-Sectional Study           | 2019 |
|                                  | Consumers' perception of risk is influenced by news media, internet and other media                                                                | food safety risk transmission perception | China | Analysis of Transmission Model of Consumers' Risk Perception of Food Safety based on Case Analysis        | 2013 |
| <b>Concern about food safety</b> | The greater the concern with risk, the greater the willingness to pay for food safety information                                                  | Related to the production process        | China | Modeling heterogeneity in consumer preferences for select food safety attributes in China                 | 2011 |

|                                                                                                                                                                                                                                |                                           |              |                                                                                                                                                     |      |
|--------------------------------------------------------------------------------------------------------------------------------------------------------------------------------------------------------------------------------|-------------------------------------------|--------------|-----------------------------------------------------------------------------------------------------------------------------------------------------|------|
| Existence of concern with quality and safety issues associated with minimally processed vegetables                                                                                                                             | food contamination                        | Brazil       | Consumer purchase habits and views on food safety: A Brazilian study                                                                                | 2010 |
| Greater concern about food hazards of technological origin.                                                                                                                                                                    | food contamination                        | Brazil       | Consumer purchase habits and views on food safety: A Brazilian study                                                                                | 2010 |
| Little concern about natural hazards such as microbiological contaminants                                                                                                                                                      | food contamination                        | Brazil       | Consumer purchase habits and views on food safety: A Brazilian study                                                                                | 2010 |
| The need for consumer information on food safety has a significant positive effect on food safety risk communication                                                                                                           | Food safety communication on social media | China        | Consumers' Food Safety Risk Communication on Social Media Following the Suan Tang Zi Accident: An Extended Protection Motivation Theory Perspective | 2021 |
| Concerns (safety of chicken meat when shopping, during storage and preparation of chicken meat at home, and when consuming chicken meat outside the home) of respondents were inconsistent with their self-reported practices. | Foodborne disease - raw chicken           | South Africa | Assessment of safety risks associated with handling chicken as based on practices and knowledge of the group of South African consumers             | 2019 |
| Respondents were concerned about sensory evaluation or food quality                                                                                                                                                            | Milk and dairy products                   | India        | Customer's Decisiveness About Food Safety Apprehensions of Dairy Products: A Consumer-Centric Approach                                              | 2019 |
| Most respondents were concerned about the dangers of pesticides, followed by illnesses and health disorders                                                                                                                    | Milk and dairy products                   | India        | Customer's Decisiveness About Food Safety Apprehensions of Dairy Products: A Consumer-Centric Approach                                              | 2019 |
| Respondents are also concerned about the risks related to food packaging, both in terms of sustainability and in terms of food quality                                                                                         | Milk and dairy products                   | India        | Customer's Decisiveness About Food Safety Apprehensions of Dairy Products: A Consumer-Centric Approach                                              | 2019 |
| Chemical waste is the number one food safety concern in the dairy industry                                                                                                                                                     | dairy products                            | China        | Exploring Chinese consumers' attitudes toward traceable dairy products: A focus group study                                                         | 2020 |
| Beef and pork are, to some extent, associated with health risks, unlike chicken                                                                                                                                                | health risks                              | Brazil       | Beef, chicken and pork consumption and consumer safety and nutritional concerns in the City of Campinas, Brazil                                     | 2008 |
| greater concern with safety attributes than with nutritional attributes                                                                                                                                                        | health risks                              | Brazil       | Beef, chicken and pork consumption and consumer safety and nutritional concerns in the City of Campinas, Brazil                                     | 2008 |

|                                                                                                                                                                                                                                                             |                                |        |                                                                                                                   |      |
|-------------------------------------------------------------------------------------------------------------------------------------------------------------------------------------------------------------------------------------------------------------|--------------------------------|--------|-------------------------------------------------------------------------------------------------------------------|------|
| Food safety concerns do not have a major impact on the likelihood of adherence for certification-oriented or price-of-origin-oriented consumers.                                                                                                            | Fuji apple                     | China  | Food Safety Concerns and Consumer Preferences for Food Safety Attributes: Evidence from China                     | 2020 |
| a large proportion of consumers expressed indifference and little or no concern for other relevant food safety issues                                                                                                                                       | Foodborne disease - Food Truck | Brazil | Brazilian Food Truck Consumers' Profile, Choices, Preferences, and Food Safety Importance Perception              | 2019 |
| The perception of the importance of food safety for food safety training did not differ between education level, gender or marital status;                                                                                                                  | Foodborne disease - Food Truck | Brazil | Brazilian Food Truck Consumers' Profile, Choices, Preferences, and Food Safety Importance Perception              | 2019 |
| Most were concerned about the use of gloves, masks, caps, the existence of a sink for hand washing, correct use of garbage collectors and the absence of pests and vectors in the preparation area                                                          | Foodborne disease - Food Truck | Brazil | Brazilian Food Truck Consumers' Profile, Choices, Preferences, and Food Safety Importance Perception              | 2019 |
| Concern for fresh food sold locally increases with awareness of the hygiene of places where fresh food is sold                                                                                                                                              | Foodborne disease - awareness  | China  | Chinese consumers food purchasing behaviors and awareness of food safety                                          | 2017 |
| Consumers say that meat and contamination during transport pose a greater risk to safety; less concern with vegetables and fruits; concerned about contamination during the transport of frozen food and suspicions about shelf life and storage conditions | foodborne disease              | China  | Chinese consumers' perceptions of food safety cues and maximizing the effectiveness of food safety communications | 2020 |
| Additives and GM major associations with food safety; fresh food has less additives; associate "sanitation" with the hygiene condition of food; food safety is related to health and nutrition.                                                             | foodborne disease              | China  | Chinese consumers' perceptions of food safety cues and maximizing the effectiveness of food safety communications | 2020 |
| Both groups (high and low anchoring) expressed concern about FBD before the intervention and it                                                                                                                                                             | foodborne disease              | China  | Cognitive Biases of Consumers' Risk Perception of Foodborne Diseases in China: Examining Anchoring Effect         | 2019 |

|                                                                                                                                                                                                                                                                                                                                      |                                            |        |                                                                                                                       |      |  |
|--------------------------------------------------------------------------------------------------------------------------------------------------------------------------------------------------------------------------------------------------------------------------------------------------------------------------------------|--------------------------------------------|--------|-----------------------------------------------------------------------------------------------------------------------|------|--|
| increased with the intervention.                                                                                                                                                                                                                                                                                                     |                                            |        |                                                                                                                       |      |  |
| Perception of sanitation at the place of purchase: supermarket group - I was more satisfied                                                                                                                                                                                                                                          | meat safety                                | Brazil | Concerns, attitudes, and opinions of meat buyers in Garanhuns, Pernambuco, Brazil                                     | 2021 |  |
| Recall was perceived as a sign of recognition by the producer of consumer concerns                                                                                                                                                                                                                                                   | Chemical and microbiological contamination | Brazil | Consumer perceptions of chemical and microbiological contaminants associated with food chains: A cross-national study | 2011 |  |
| powdered milk can be easily contaminated by chemicals used in the formation phase process; the chicken chain is more vulnerable; farmed salmon: chemical and microbiological contaminants were considered risky; Drinking water: considered that the drinking water chain is subject to contamination from a variety of contaminants | Chemical and microbiological contamination | Brazil | Consumer perceptions of chemical and microbiological contaminants associated with food chains: A cross-national study | 2011 |  |
| greater concern with different types of additives and more chemical than microbiological contamination                                                                                                                                                                                                                               | Chemical and microbiological contamination | Brazil | Consumer perceptions of chemical and microbiological contaminants associated with food chains: A cross-national study | 2011 |  |
| considered all meat products were risky in terms of contamination, fruits and vegetables were considered less risky and dry food products were considered less vulnerable to contamination;                                                                                                                                          | Chemical and microbiological contamination | Brazil | Consumer perceptions of chemical and microbiological contaminants associated with food chains: A cross-national study | 2011 |  |
| food products are exposed to potential contamination risks                                                                                                                                                                                                                                                                           | Chemical and microbiological contamination | Brazil | Consumer perceptions of chemical and microbiological contaminants associated with food chains: A cross-national study | 2011 |  |
| Most Chinese consumers are concerned about food safety issues                                                                                                                                                                                                                                                                        | food traceability                          | China  | Factors Affecting Consumer Willingness to Pay for Certified Traceable Food in Jiangsu Province of China               | 2021 |  |
| Degree of concern has significant effect on willingness to pay a premium on traceable food                                                                                                                                                                                                                                           | food traceability                          | China  | Factors Affecting Consumer Willingness to Pay for Certified Traceable Food in Jiangsu Province of China               | 2021 |  |



|                           |                                                                                                                                                                              |                                                |        |                                                                                                                                        |      |
|---------------------------|------------------------------------------------------------------------------------------------------------------------------------------------------------------------------|------------------------------------------------|--------|----------------------------------------------------------------------------------------------------------------------------------------|------|
|                           | If consumers have a higher level of concern about the safety of vegetables, there is a higher purchase intention and willingness to pay a premium price for safe vegetables. | Vegetables                                     | China  | Consumers' perceptions, purchase intention, and willingness to pay a premium price for safe vegetables: A case study of Beijing, China | 2018 |
|                           | most were concerned about food safety (attitude towards purchase)                                                                                                            | meat safety                                    | Brazil | Concerns, attitudes, and opinions of meat buyers in Garanhuns, Pernambuco, Brazil                                                      | 2021 |
|                           | food safety had the greatest influence on the general attitude towards different pig production systems.                                                                     | swine                                          | China  | Consumer attitudes to different pig production systems: a study from mainland China                                                    | 2013 |
|                           | Brazilians indicated that they are more concerned about food safety and hygiene practices in the context of COVID-19                                                         | COVID-19                                       | Brazil | Effect of the COVID-19 pandemic on food habits and perceptions: A study with Brazilians                                                | 2021 |
| Frequency of consumption  | The higher the frequency of consumption, the greater the concern with milk safety                                                                                            | Milk                                           | China  | Perceived risks and safety concerns about fluid milk among Chinese college students                                                    | 2010 |
|                           | The greater the expenditure on food in the family, the greater the intention to buy safe vegetables                                                                          | Vegetables                                     | China  | Consumers' perceptions, purchase intention, and willingness to pay a premium price for safe vegetables: A case study of Beijing, China | 2018 |
| Subjective norm           | The higher the subjective norm, the greater the perception of risk                                                                                                           | Additions                                      | China  | Public risk perception of food additives and food scares. The case in Suzhou, China                                                    | 2013 |
|                           | Subjective norm is a significant predictor of intention to hygienic food handling                                                                                            | Intention of hygienic handling of food         | China  | Hygienic food handling intention. An application of the Theory of Planned Behavior in the Chinese cultural context                     | 2014 |
|                           | Influence of media reports on consumers is positively associated with purchase intentions                                                                                    | Purchase intention during the Avian Flu period | China  | Avian Influenza-Factors Affecting Consumers' Purchase Intentions toward Poultry Products                                               | 2019 |
| Perception of information | The greater the perception of information, the greater the perception of risk                                                                                                | Additions                                      | China  | Public risk perception of food additives and food scares. The case in Suzhou, China                                                    | 2013 |
|                           | Perception of information: the origin of chicken products is essential for consumers                                                                                         | Purchase intention during the Avian Flu period | China  | Avian Influenza-Factors Affecting Consumers' Purchase Intentions toward Poultry Products                                               | 2019 |
|                           | Most respondents believe that the information available is not sufficient to judge the safety of a food.                                                                     | Milk and dairy products                        | India  | Customer's Decisiveness About Food Safety Apprehensions of Dairy Products: A Consumer-Centric Approach                                 | 2019 |
|                           | Preference for information sources that are empirically proven to significantly                                                                                              | Risk information sources                       | China  | Does Information Pattern Affect Risk Perception of Food Safety? The National Survey in China                                           | 2018 |

|                                                             |                                                                                                                                                               |                                           |              |                                                                                                                                                                                      |      |
|-------------------------------------------------------------|---------------------------------------------------------------------------------------------------------------------------------------------------------------|-------------------------------------------|--------------|--------------------------------------------------------------------------------------------------------------------------------------------------------------------------------------|------|
|                                                             | affect your perceptions of food safety                                                                                                                        |                                           |              |                                                                                                                                                                                      |      |
|                                                             | Social media is the main source of misinformation about food safety                                                                                           | Dissemination of disinformation           | China        | Fake news or bad news? Toward an emotion-driven cognitive dissonance model of misinformation diffusion                                                                               | 2020 |
|                                                             | Exposure to online news reduces levels of misinformation                                                                                                      | Dissemination of disinformation           | China        | Fake news or bad news? Toward an emotion-driven cognitive dissonance model of misinformation diffusion                                                                               | 2020 |
|                                                             | Trust in information sources is a strong determinant of consumer response in terms of consumption intention or willingness to pay                             | Chicken                                   | China        | Fear and trust: How risks perceptions of avian influenza affect Chinese consumers' demand for chicken                                                                                | 2016 |
| Experience (direct or indirect) with a food safety incident | Consumers who have had direct experiences with food safety incidents know more about food safety and are more familiar with it.                               | None                                      | China        | Research on the Influence Mechanism of Rational Consumers' Food Safety Supervision Satisfaction                                                                                      | 2019 |
|                                                             | Defensive psychological state after severe food quality safety crises                                                                                         | None                                      | China        | Why Do Consumers Switch in Food Safety Crisis? A View of Regulatory Focus Theory                                                                                                     | 2015 |
|                                                             | Food safety incidents can significantly affect consumers' purchasing response, increasing the purchase of organic products                                    | Organic products                          | China        | The Predictors of Consumer Behavior in Relation to Organic Food in the Context of Food Safety Incidents: Advancing Hyper Attention Theory Within an Stimulus-Organism-Response Model | 2019 |
|                                                             | Previous negative experience with Foodborne disease increases the perception of risk of Foodborne disease                                                     | foodborne disease                         | China        | Consumer's risk perception of Foodborne diseases and high-risk food safety practices in domestic kitchens                                                                            | 2019 |
|                                                             | The perceived severity of a previous food safety accident has a positive effect on consumer protection motivation                                             | Food safety communication on social media | China        | Consumers' Food Safety Risk Communication on Social Media Following the Suan Tang Zi Accident: An Extended Protection Motivation Theory Perspective                                  | 2021 |
|                                                             | Few consumers know details of incidents about the quality and safety of fish products                                                                         | fishing products                          | China        | Consumers' perception toward quality and safety of fishery products, Beijing, China                                                                                                  | 2009 |
|                                                             | The greater the understanding of past background related to meat food safety, the richer the knowledge about food safety and the more attentive to food risks | foodborne disease in meat                 | South Africa | Consumers' Social Representations of Meat Safety in Two Selected Restaurants of Raymond Mhlaba Municipality in the Eastern Cape, South Africa                                        | 2017 |
|                                                             | The prevalence of food safety incidents causes consumers to lessen their                                                                                      | dairy products                            | China        | Exploring Chinese consumers' attitudes toward traceable dairy products: A focus group study                                                                                          | 2020 |



|                                  |                                                                                                                                                                               |                                    |       |                                                                                                                                                          |      |
|----------------------------------|-------------------------------------------------------------------------------------------------------------------------------------------------------------------------------|------------------------------------|-------|----------------------------------------------------------------------------------------------------------------------------------------------------------|------|
|                                  | confidence in food safety and pay more attention to news about food safety incidents in the media, including social media.                                                    |                                    |       |                                                                                                                                                          |      |
|                                  | Chicken consumption did not increase after the appearance of H7N9                                                                                                             | Chicken                            | China | Fear and trust: How risks perceptions of avian influenza affect Chinese consumers' demand for chicken                                                    | 2016 |
|                                  | Food safety incident triggers the risk of price changes for high-risk food products but not low-risk food products                                                            | Reactions to food safety incidents | China | Food Safety Incident, Public Health Concern, and Risk Spillover Heterogeneity: Avian Influenza Shocks as Natural Experiments in China's Consumer Markets | 2019 |
|                                  | Food safety incidents trigger, amplify public health concerns and affect food prices                                                                                          | Reactions to food safety incidents | China | Food Safety Incident, Public Health Concern, and Risk Spillover Heterogeneity: Avian Influenza Shocks as Natural Experiments in China's Consumer Markets | 2019 |
|                                  | Dairy security incidents (especially melamine incidents) increase urban residents' perception of risk, resulting in a rapid decrease in dairy consumption.                    | dairy                              | China | Food safety issues in China: a case study of the dairy sector                                                                                            | 2015 |
|                                  | The impact of the dairy safety incidents lasted for at least 5 years and the consumption of dairy products has not fully recovered by the date of publication of the article. | dairy                              | China | Food safety issues in China: a case study of the dairy sector                                                                                            | 2015 |
|                                  | food marketing declined if anyone had heard of reports of food safety incidents                                                                                               | Foodborne disease - awareness      | China | Chinese consumers food purchasing behaviors and awareness of food safety                                                                                 | 2017 |
|                                  |                                                                                                                                                                               |                                    |       |                                                                                                                                                          |      |
| Trust in Government and Policies | The greater the confidence in the government, the lower the perception of risk on food safety                                                                                 | None                               | China | Research on the influencing factors of consumer food safety risk perception                                                                              | 2017 |
|                                  | Government regulation on food safety and consumer protection is an attribute of low importance for food purchasing decision making.                                           | regulation                         | India | Consumers' Perspectives on Mandatory versus Voluntary Provisions of Food Safety Regulations in India                                                     | 2013 |
|                                  | Consumers believe government must play a critical role in providing safe food                                                                                                 | regulation                         | India | Consumers' Perspectives on Mandatory versus Voluntary Provisions of Food Safety Regulations in India                                                     | 2013 |
|                                  | Consumers who prefer to assess product quality prior to purchase (search                                                                                                      | regulation                         | India | Consumers' Perspectives on Mandatory versus Voluntary Provisions of Food Safety Regulations in India                                                     | 2013 |

|                                |                                                                                                                                                                                                                                                                                                                                                                                                 |                                        |              |                                                                                                                                               |      |
|--------------------------------|-------------------------------------------------------------------------------------------------------------------------------------------------------------------------------------------------------------------------------------------------------------------------------------------------------------------------------------------------------------------------------------------------|----------------------------------------|--------------|-----------------------------------------------------------------------------------------------------------------------------------------------|------|
|                                | attribute) believe that voluntary provisions are sufficient for effective regulation of food safety. Consumers who prefer certifications and regulatory practices (credence attribute) understand that the combination of voluntary and mandatory provisions need to be implemented for an effective regulation of food safety [in this case, mandatory regulation is of paramount importance]. |                                        |              |                                                                                                                                               |      |
|                                | Low satisfaction from government oversight and food producers' control over food quality, yet consumers are concerned about meat food safety issues                                                                                                                                                                                                                                             | foodborne disease in meat              | South Africa | Consumers' Social Representations of Meat Safety in Two Selected Restaurants of Raymond Mhlaba Municipality in the Eastern Cape, South Africa | 2017 |
|                                | The distrust in the government will increase the consumption intention and the willingness to pay                                                                                                                                                                                                                                                                                               | Chicken                                | China        | Fear and trust: How risks perceptions of avian influenza affect Chinese consumers' demand for chicken                                         | 2016 |
|                                | Consensus of participants that local government is ineffective in regulation, causing food safety problems                                                                                                                                                                                                                                                                                      | Perception about food safety condition | China        | Food safety in urban China: Perceptions and coping strategies of residents in Nanjing                                                         | 2017 |
|                                | When consumers realized that food safety authorities had taken steps to proactively protect the public, they rated FRMQ (Quality in Food Risk Management) more positively;                                                                                                                                                                                                                      | None                                   | Russia       | Consumer evaluations of food risk management in Russia                                                                                        | 2010 |
|                                | Russian consumers were not confident that food safety related laws and regulations were being enforced                                                                                                                                                                                                                                                                                          | None                                   | Russia       | Consumer evaluations of food risk management in Russia                                                                                        | 2010 |
|                                | perception that the competent authorities could not or were not willing to take responsibility for all problems related to food safety                                                                                                                                                                                                                                                          | None                                   | Russia       | Consumer evaluations of food risk management in Russia                                                                                        | 2010 |
| <b>Confidence in the Media</b> | The greater the confidence in the media, the lower the                                                                                                                                                                                                                                                                                                                                          | None                                   | China        | Research on the influencing factors of consumer food safety risk perception                                                                   | 2017 |

|                                      |                                                                                                                                                                                 |                                           |              |                                                                                                                                                |      |  |
|--------------------------------------|---------------------------------------------------------------------------------------------------------------------------------------------------------------------------------|-------------------------------------------|--------------|------------------------------------------------------------------------------------------------------------------------------------------------|------|--|
|                                      | perception of food safety risk                                                                                                                                                  |                                           |              |                                                                                                                                                |      |  |
|                                      | Awareness of the value of news, trust and emotion reduces respondents' perception of probability risk                                                                           | Traceability system - food safety problem | China        | Are social embeddedness associated with food risk perception under media coverage?                                                             | 2019 |  |
|                                      | The greater the trust in manufacturers and retailers, the greater the perception of food safety                                                                                 | None                                      | China        | The effects of different types of trust on consumer perceptions of food safety: An empirical study of consumers in Beijing Municipality, China | 2013 |  |
|                                      | The brand is of great importance in the purchase decision process                                                                                                               | dairy products                            | China        | Understanding Chinese consumers' safety perceptions of dairy products: a qualitative study                                                     | 2021 |  |
|                                      | Familiarity with the butcher is seen as a way to build consumer confidence.                                                                                                     | food contamination                        | Brazil       | Consumer purchase habits and views on food safety: A Brazilian study                                                                           | 2010 |  |
|                                      | Perceptions of personal hygiene at the place of meat purchase plays an important role in ensuring safe products for the consumer                                                | foodborne disease in meat                 | South Africa | Consumers' Social Representations of Meat Safety in Two Selected Restaurants of Raymond Mhlaba Municipality in the Eastern Cape, South Africa  | 2017 |  |
|                                      | The production and marketing of vegetables is the method used to assess safe vegetables                                                                                         | Vegetables                                | China        | Consumers' perceptions, purchase intention, and willingness to pay a premium price for safe vegetables: A case study of Beijing, China         | 2018 |  |
| Trust in manufacturers and retailers | high level of experience perceived by consumers as possessed by food risk managers was associated with a more positive assessment of the FRMQ (quality in food risk management) | None                                      | Russia       | Consumer evaluations of food risk management in Russia                                                                                         | 2010 |  |
|                                      | the more consumers perceived risk managers as dishonest, the less they believed the FRMQ was adequate.                                                                          | None                                      | Russia       | Consumer evaluations of food risk management in Russia                                                                                         | 2010 |  |
|                                      | the large-scale industrial food production system is generally well accepted as it appears to be a pathway to food safety,                                                      | swine                                     | China        | Consumer attitudes to different pig production systems: a study from mainland China                                                            | 2013 |  |
|                                      | Chinese were more positive about pig production systems where "food safety receives the utmost attention when raising pigs on this farm                                         | swine                                     | China        | Consumer attitudes to different pig production systems: a study from mainland China                                                            | 2013 |  |
|                                      |                                                                                                                                                                                 |                                           |              |                                                                                                                                                |      |  |

|                                                                  |                                                                                                                                                                                              |                                        |              |                                                                                                                                               |      |
|------------------------------------------------------------------|----------------------------------------------------------------------------------------------------------------------------------------------------------------------------------------------|----------------------------------------|--------------|-----------------------------------------------------------------------------------------------------------------------------------------------|------|
| <b>Confidence in certification / perception of certification</b> | Consumers demand safe food but do not fully trust food certifications as a guarantee of safety                                                                                               | certified food                         | China        | Urban Consumer Trust and Food Certifications in China                                                                                         | 2020 |
|                                                                  | The expiration dates shown on the meat packages were more important measures in meat spoilage than the visual appearance or color of the meat.                                               | foodborne disease in meat              | South Africa | Consumers' Social Representations of Meat Safety in Two Selected Restaurants of Raymond Mhlaba Municipality in the Eastern Cape, South Africa | 2017 |
|                                                                  | Most consumers use certification labels on vegetable packaging to identify safe vegetables                                                                                                   | Vegetables                             | China        | Consumers' perceptions, purchase intention, and willingness to pay a premium price for safe vegetables: A case study of Beijing, China        | 2018 |
|                                                                  | Confidence in the label had a significant positive effect on purchase intent and willingness to pay a premium price for safe vegetables                                                      | Vegetables                             | China        | Consumers' perceptions, purchase intention, and willingness to pay a premium price for safe vegetables: A case study of Beijing, China        | 2018 |
|                                                                  | Respondents have doubts about the veracity of traceability information                                                                                                                       | dairy products                         | China        | Exploring Chinese consumers' attitudes toward traceable dairy products: A focus group study                                                   | 2020 |
|                                                                  | Foods with national and North American labels have greater acceptance for premium price among Chinese consumers                                                                              | Pig meat                               | China        | Factoring Chinese consumers' risks perceptions into their willingness to pay for pork safety, environmental stewardship, and animal welfare   | 2018 |
|                                                                  | Chinese Consumers Value Government Certification More                                                                                                                                        | Fuji apple                             | China        | Food Safety Concerns and Consumer Preferences for Food Safety Attributes: Evidence from China                                                 | 2020 |
|                                                                  | Chinese consumers may not understand the meaning of safety rating notifications and official inspection certifications and therefore rarely use them to assess the safety of restaurant food | Restaurants                            | China        | Food safety in restaurants: The consumer perspective                                                                                          | 2019 |
|                                                                  | The participants' perception is that food monitoring and regulation is not adequate to ensure the safety of food sources                                                                     | Perception about food safety condition | China        | Food safety in urban China: Perceptions and coping strategies of residents in Nanjing                                                         | 2017 |
|                                                                  | Certification-oriented consumers have a high assessment of food safety and government oversight of food safety. Price- and origin-oriented consumers only place a high value on              | Fuji apple                             | China        | Food Safety Concerns and Consumer Preferences for Food Safety Attributes: Evidence from China                                                 | 2020 |

|                                        |                                                                                                                                                                                                               |                                                                                      |        |                                                                                                                                                     |      |
|----------------------------------------|---------------------------------------------------------------------------------------------------------------------------------------------------------------------------------------------------------------|--------------------------------------------------------------------------------------|--------|-----------------------------------------------------------------------------------------------------------------------------------------------------|------|
| the local assessment of food security. |                                                                                                                                                                                                               |                                                                                      |        |                                                                                                                                                     |      |
| Loss aversion                          | Loss aversion influences consumers in their food choices for food safety                                                                                                                                      | Food safety (certification and traceability) vs. Quality labels (brand and category) | China  | Influence of Loss Aversion and Income Effect on Consumer Food Choice for Food Safety and Quality Labels                                             | 2021 |
|                                        | Concerning the wage discount if there is a Foodborne disease, the perception of risk is not greater because the consumer has to stop working for one to three days, but because of the financial consequences | foodborne disease                                                                    | Brazil | Consumer risk perceptions concerning different consequences of Foodborne disease acquired from food consumed away from home: A case study in Brazil | 2022 |
|                                        | Financial loss resulting from medications or medical treatments has less impact than the physical consequences of a Foodborne disease                                                                         | foodborne disease                                                                    | Brazil | Consumer risk perceptions concerning different consequences of Foodborne disease acquired from food consumed away from home: A case study in Brazil | 2022 |
|                                        | Perceived vulnerability in relation to food safety has a significant positive effect on consumer protection motivation                                                                                        | Food safety communication on social media                                            | China  | Consumers' Food Safety Risk Communication on Social Media Following the Suan Tang Zi Accident: An Extended Protection Motivation Theory Perspective | 2021 |
|                                        | The probability of illness impacts the preference for obtaining safe food products                                                                                                                            | Pig meat                                                                             | China  | Factoring Chinese consumers' risks perceptions into their willingness to pay for pork safety, environmental stewardship, and animal welfare         | 2018 |
| Safety Perception                      | Consumers are willing to pay a premium price for a safer meal                                                                                                                                                 | foodborne disease                                                                    | Brazil | Consumer risk perceptions concerning different consequences of Foodborne disease acquired from food consumed away from home: A case study in Brazil | 2022 |
|                                        | The willingness to pay for safe, high-quality fruit decreases as prices rise, so consumers are willing to pay a premium for "safe grapes", but within a scope                                                 | grape products                                                                       | China  | Consumers' perceptions of quality and safety for grape products: A case study in Zhejiang Province, China                                           | 2012 |
|                                        | Most consumers are willing to buy safe vegetables, including paying a premium price.                                                                                                                          | Vegetables                                                                           | China  | Consumers' perceptions, purchase intention, and willingness to pay a premium price for safe vegetables: A case study of Beijing, China              | 2018 |
|                                        | Willingness to pay for safe chicken has not increased compared to generic risks associated with chicken consumption in 2012                                                                                   | Chicken                                                                              | China  | Fear and trust: How risks perceptions of avian influenza affect Chinese consumers' demand for chicken                                               | 2016 |

|                                                                                                                                                                                          |                            |        |                                                                                                                                        |      |
|------------------------------------------------------------------------------------------------------------------------------------------------------------------------------------------|----------------------------|--------|----------------------------------------------------------------------------------------------------------------------------------------|------|
| Willingness to pay a premium price for apples' safety attributes                                                                                                                         | Fuji apple                 | China  | Food Safety Concerns and Consumer Preferences for Food Safety Attributes: Evidence from China                                          | 2020 |
| The majority of those who have consumed insects believe that this source is safe, very safe or extremely safe and a minority claimed to be unsafe, very unsafe or extremely unsafe.      | Insect consumption safety  | Brazil | Brazilian consumers' perception of edible insects                                                                                      | 2019 |
| Most respondents do not consider domestically produced cheese as a risky product in terms of food safety, but of a lower quality than imported cheese.                                   | national x imported cheese | Russia | Food quality vs food patriotism: Russian consumers' preferences for cheese after the food import ban                                   | 2018 |
| The three main advantages perceived by consumers with respect to safe vegetables are: food safety, rigorous production and processing, and a healthy environment.                        | Vegetables                 | China  | Consumers' perceptions, purchase intention, and willingness to pay a premium price for safe vegetables: A case study of Beijing, China | 2018 |
| Greater perception of quality and safety with respect to imported grapes                                                                                                                 | grape products             | China  | Consumers' perceptions of quality and safety for grape products: A case study in Zhejiang Province, China                              | 2012 |
| The perception of safety is important in evaluating the quality of grape products.                                                                                                       | grape products             | China  | Consumers' perceptions of quality and safety for grape products: A case study in Zhejiang Province, China                              | 2012 |
| The three main advantages perceived by consumers with respect to safe vegetables are: food safety, rigorous production and processing, and a healthy environment.                        | Vegetables                 | China  | Consumers' perceptions, purchase intention, and willingness to pay a premium price for safe vegetables: A case study of Beijing, China | 2018 |
| The perception of the safety status of vegetables has a significant negative effect on purchase intent and willingness to pay a premium price for safe vegetables.                       | Vegetables                 | China  | Consumers' perceptions, purchase intention, and willingness to pay a premium price for safe vegetables: A case study of Beijing, China | 2018 |
| Purchase awareness (freshness, warranty period and expiration date, date of harvest, nutritional health, production area, packaging, trusted label, media promotion, recommendation from | Vegetables                 | China  | Consumers' perceptions, purchase intention, and willingness to pay a premium price for safe vegetables: A case study of Beijing, China | 2018 |



|           |                                                                                                                                                                       |                                                |        |                                                                                                                                                                   |      |  |
|-----------|-----------------------------------------------------------------------------------------------------------------------------------------------------------------------|------------------------------------------------|--------|-------------------------------------------------------------------------------------------------------------------------------------------------------------------|------|--|
| Knowledge | others, online shopping experience) influenced purchase intent and disposition of paying a premium price for safe vegetables                                          |                                                |        |                                                                                                                                                                   |      |  |
|           | The more consumers believe that the purchase of chicken products can pose a threat to their health, the more they will reduce their purchase of chicken products.     | Purchase intention during the Avian Flu period | China  | Avian Influenza-Factors Affecting Consumers' Purchase Intentions toward Poultry Products                                                                          | 2019 |  |
|           | consumers believe that during the bird flu period they will, to some extent, reduce their purchases of chicken products.                                              | Purchase intention during the Avian Flu period | China  | Avian Influenza-Factors Affecting Consumers' Purchase Intentions toward Poultry Products                                                                          | 2019 |  |
|           | Knowledge of traceable dairy products is low                                                                                                                          | dairy products                                 | China  | Exploring Chinese consumers' attitudes toward traceable dairy products: A focus group study                                                                       | 2020 |  |
|           | Greater knowledge about pathogens or professional knowledge about food safety increases risk perception of Foodborne disease                                          | foodborne disease                              | China  | Consumer's risk perception of Foodborne diseases and high-risk food safety practices in domestic kitchens                                                         | 2019 |  |
|           | Low knowledge about quality, safety and traceability systems of fishery products                                                                                      | fishing products                               | China  | Consumers' perception toward quality and safety of fishery products, Beijing, China                                                                               | 2009 |  |
|           | Consumers with greater knowledge about safe vegetables are more likely to have a higher purchase intention and willingness to pay a premium price for safe vegetables | Vegetables                                     | China  | Consumers' perceptions, purchase intention, and willingness to pay a premium price for safe vegetables: A case study of Beijing, China                            | 2018 |  |
|           | Most consumers are unaware of the safety and quality of meat                                                                                                          | Beef                                           | India  | Consumption pattern, consumer attitude and consumer perception on meat quality and safety in Southern India                                                       | 2018 |  |
|           | The vast majority of respondents do not attribute meat consumption to any type of food poisoning                                                                      | Beef                                           | India  | Consumption pattern, consumer attitude and consumer perception on meat quality and safety in Southern India                                                       | 2018 |  |
|           | Most respondents reported not having heard about Vibrio and Listeria monocytogenes as bacterial                                                                       | Seafood                                        | Brazil | Consumption, knowledge, and food safety practices of Brazilian seafood consumers Consumption, knowledge, and food safety practices of Brazilian seafood consumers | 2020 |  |

|                                                                                                                                                              |                                 |        |                                                                                                                                 |      |  |
|--------------------------------------------------------------------------------------------------------------------------------------------------------------|---------------------------------|--------|---------------------------------------------------------------------------------------------------------------------------------|------|--|
| pathogens associated with seafood consumption                                                                                                                |                                 |        |                                                                                                                                 |      |  |
| Lack of knowledge and skills in food handling behavior is the main reason for not adopting proper food safety self-protection behavior.                      | foodborne disease               | China  | Determinants of consumer food safety self-protection behavior-- an analysis using grounded theory                               | 2020 |  |
| Knowledge of food safety affects self-protection behavior through self-protection awareness                                                                  | foodborne disease               | China  | Determinants of consumer food safety self-protection behavior-- an analysis using grounded theory                               | 2020 |  |
| Individuals who have more erroneous information disclose (mis)information about food safety more often online                                                | Dissemination of disinformation | China  | Fake news or bad news? Toward an emotion-driven cognitive dissonance model of misinformation diffusion                          | 2020 |  |
| The majority has no opinion about safety and the minority believes it is safe.                                                                               | Insect consumption safety       | Brazil | Brazilian consumers' perception of edible insects                                                                               | 2019 |  |
| Among the participants who do not consume insects, most do not have an opinion and of those who do, most claim to be unsafe, very unsafe or extremely unsafe | Insect consumption safety       | Brazil | Brazilian consumers' perception of edible insects                                                                               | 2019 |  |
| Knowledge about food safety and the choice of food purchased are related to sociodemographic factors                                                         | Foodborne disease - awareness   | China  | Chinese consumers food purchasing behaviors and awareness of food safety                                                        | 2017 |  |
| Most are familiar with the country of origin, traceability, organic and quality attribute terminology certifications from the dairy farm itself;             | powdered milk safety            | China  | Chinese consumers' preferences for food quality test/measurement indicators and cues of milk powder: A case of Zhengzhou, China | 2019 |  |
| FBD knowledge cannot effectively reduce the external anchoring effect                                                                                        | foodborne disease               | China  | Cognitive Biases of Consumers' Risk Perception of Foodborne Diseases in China: Examining Anchoring Effect                       | 2019 |  |
| The majority reported consuming inspected meat or having undergone a quality control process (Knowledge about inspection/quality control process)            | meat safety                     | Brazil | Concerns, attitudes, and opinions of meat buyers in Garanhuns, Pernambuco, Brazil                                               | 2021 |  |
| Most claimed to know the risks and had the understanding that the consumption of                                                                             | meat safety                     | Brazil | Concerns, attitudes, and opinions of meat buyers in Garanhuns, Pernambuco, Brazil                                               | 2021 |  |



|                          |                                                                                                                                                                                                       |                                          |              |                                                                                                                                                                   |      |  |
|--------------------------|-------------------------------------------------------------------------------------------------------------------------------------------------------------------------------------------------------|------------------------------------------|--------------|-------------------------------------------------------------------------------------------------------------------------------------------------------------------|------|--|
|                          | unregulated meat could result in the transmission of diseases                                                                                                                                         |                                          |              |                                                                                                                                                                   |      |  |
|                          | More than half knew that pork with cysticercosis could be harmful to health and could identify cysts when slaughtering pigs at home, but were unaware of the symptoms related to human cysticercosis; | Biological contamination (Taenia solium) | South Africa | Consumer knowledge and practices for pork safety in two Taenia solium cysticercosis endemic districts in Eastern Cape Province of South Africa                    | 2020 |  |
|                          | consumers were unaware of existing meat/food safety legislations                                                                                                                                      | Biological contamination (Taenia solium) | South Africa | Consumer knowledge and practices for pork safety in two Taenia solium cysticercosis endemic districts in Eastern Cape Province of South Africa                    | 2020 |  |
| Eating habits and health | The frequency of cooking, cleaning of cutting tools and cutting boards and the storage time of food at room temperature were independent of the risk perception of Foodborne disease                  | foodborne disease                        | China        | Consumer's risk perception of Foodborne diseases and high-risk food safety practices in domestic kitchens                                                         | 2019 |  |
|                          | Consumers with good hygiene and eating habits have a higher perception of risk for Foodborne disease                                                                                                  | foodborne disease                        | China        | Consumer's risk perception of Foodborne diseases and high-risk food safety practices in domestic kitchens                                                         | 2019 |  |
|                          | Most consumers return the product, followed by discarding the product and complaining to the competent body.                                                                                          | fishing products                         | China        | Consumers' perception toward quality and safety of fishery products, Beijing, China                                                                               | 2009 |  |
|                          | Most interviewees stated that they adopted some hygienic practice when handling seafood (washing hands with soap; the majority claimed to separate raw foods from ready-to-eat foods)                 | Seafood                                  | Brazil       | Consumption, knowledge, and food safety practices of Brazilian seafood consumers Consumption, knowledge, and food safety practices of Brazilian seafood consumers | 2020 |  |
|                          | The reliability of consumers' attitude towards food safety practices is high                                                                                                                          | Milk and dairy products                  | India        | Customer's Decisiveness About Food Safety Apprehensions of Dairy Products: A Consumer-Centric Approach                                                            | 2019 |  |
|                          | Personality (including personal handling habits, laziness, and past experiences) directly affects self-protective behavior and moderates the effects of knowledge and awareness on behavior.          | foodborne disease                        | China        | Determinants of consumer food safety self-protection behavior-- an analysis using grounded theory                                                                 | 2020 |  |

|                                                 |                                                                                                                                                                                                              |                                           |              |                                                                                                                                                     |      |
|-------------------------------------------------|--------------------------------------------------------------------------------------------------------------------------------------------------------------------------------------------------------------|-------------------------------------------|--------------|-----------------------------------------------------------------------------------------------------------------------------------------------------|------|
|                                                 | The thawing of chicken meat, the time and temperature of egg cooking and the yolk point are the main procedures responsible for raising the level of WHOPI (Weighted Harmonic Outbreak Prevention Index)     | chickens and eggs                         | Brazil       | Food safety behavior and handling practices during purchase, preparation, storage and consumption of chicken meat and eggs                          | 2019 |
|                                                 | Most respondents had an average level of good hygiene practices procedures                                                                                                                                   | chickens and eggs                         | Brazil       | Food safety behavior and handling practices during purchase, preparation, storage and consumption of chicken meat and eggs                          | 2019 |
|                                                 | Chinese consumers prefer to assess the level of safety of a restaurant's food based on the "sensory perception of the food" and the "restaurant environment"                                                 | Restaurants                               | China        | Food safety in restaurants: The consumer perspective                                                                                                | 2019 |
|                                                 | The way to understand whether a food is safe is by looking for signs that the food is fresh and by looking for information on which synthetic products were or were not used in the production of that food. | Perception about food safety condition    | China        | Food safety in urban China: Perceptions and coping strategies of residents in Nanjing                                                               | 2017 |
|                                                 | Most preferred the pork to be well cooked (well done), they indicated that the main reason for cooking "well done" is that it killed the germs.                                                              | Biological contamination (Taenia solium)  | South Africa | Consumer knowledge and practices for pork safety in two Taenia solium cysticercosis endemic districts in Eastern Cape Province of South Africa      | 2020 |
| <b>Probabilities and consequences</b>           | Probability and consequence measures of Foodborne disease modulate risk perception                                                                                                                           | foodborne disease                         | Brazil       | Consumer risk perceptions concerning different consequences of Foodborne disease acquired from food consumed away from home: A case study in Brazil | 2022 |
|                                                 | Consequences related to performance, physical and time increase the perception of risk                                                                                                                       | foodborne disease                         | Brazil       | Consumer risk perceptions concerning different consequences of Foodborne disease acquired from food consumed away from home: A case study in Brazil | 2022 |
| <b>Self-efficacy and response effectiveness</b> | Self-efficacy (in relation to food safety) has a significant positive effect on consumer protection motivation                                                                                               | Food safety communication on social media | China        | Consumers' Food Safety Risk Communication on Social Media Following the Suan Tang Zi Accident: An Extended Protection Motivation Theory Perspective | 2021 |
|                                                 | Response effectiveness in relation to food safety) has a positive influence on consumer protection motivation                                                                                                | Food safety communication on social media | China        | Consumers' Food Safety Risk Communication on Social Media Following the Suan Tang Zi Accident: An Extended Protection Motivation Theory Perspective | 2021 |

|                              |                                                                                                                                                            |                                           |       |                                                                                                                                                     |      |
|------------------------------|------------------------------------------------------------------------------------------------------------------------------------------------------------|-------------------------------------------|-------|-----------------------------------------------------------------------------------------------------------------------------------------------------|------|
|                              | The self-efficacy of the Internet reduces levels of misinformation, but it also facilitates the dissemination of information on food safety                | Dissemination of disinformation           | China | Fake news or bad news? Toward an emotion-driven cognitive dissonance model of misinformation diffusion                                              | 2020 |
| <b>Response barrier</b>      | Response barriers (perceived costs associated with food safety protection measures or actions) have a negative influence on consumer protection motivation | Food safety communication on social media | China | Consumers' Food Safety Risk Communication on Social Media Following the Suan Tang Zi Accident: An Extended Protection Motivation Theory Perspective | 2021 |
| <b>Protection motivation</b> | Consumer protection motivation has a significant positive influence on food safety risk communication on social media                                      | Food safety communication on social media | China | Consumers' Food Safety Risk Communication on Social Media Following the Suan Tang Zi Accident: An Extended Protection Motivation Theory Perspective | 2021 |
| <b>Emotions</b>              | Negative emotions mediate levels of misinformation and dissemination of food safety information                                                            | Dissemination of disinformation           | China | Fake news or bad news? Toward an emotion-driven cognitive dissonance model of misinformation diffusion                                              | 2020 |
|                              | Fear of the spread of H7N9 increases consumption intent and willingness to pay                                                                             | Chicken                                   | China | Fear and trust: How risks perceptions of avian influenza affect Chinese consumers' demand for chicken                                               | 2016 |

Table S4 – Motivators and effects of “other” category

| Motivator                | Observed effect                                                                                                                                                                                                                                                             | Hazard               | Country | Study title                                                                                                                            | Year |
|--------------------------|-----------------------------------------------------------------------------------------------------------------------------------------------------------------------------------------------------------------------------------------------------------------------------|----------------------|---------|----------------------------------------------------------------------------------------------------------------------------------------|------|
| Price                    | A greater fluctuation in the price of vegetables results in a lesser willingness to pay a premium price for safe vegetables                                                                                                                                                 | Vegetables           | China   | Consumers' perceptions, purchase intention, and willingness to pay a premium price for safe vegetables: A case study of Beijing, China | 2018 |
|                          | Consumers who see higher vegetable prices are no longer likely to buy and are not willing to pay a premium price for safe vegetables                                                                                                                                        | Vegetables           | China   | Consumers' perceptions, purchase intention, and willingness to pay a premium price for safe vegetables: A case study of Beijing, China | 2018 |
|                          | After the price reaches a peak level that indicates a certain quality standard, the price-value effect will dominate the price-quality effect, thus decreasing the utility for the consumer;                                                                                | powdered milk safety | China   | Chinese consumers' preferences for food quality test/measurement indicators and cues of milk powder: A case of Zhengzhou, China        | 2019 |
|                          | If the price is too low (45 RMB), the consumer considers the powdered milk to be of low quality; if the price peaks (122.2 RMB), the price-quality signaling effect decreases and the price starts to have a negative impact on the probability of purchasing powdered milk | powdered milk safety | China   | Chinese consumers' preferences for food quality test/measurement indicators and cues of milk powder: A case of Zhengzhou, China        | 2019 |
|                          | Price- and origin-oriented consumers place a high value on the local food safety assessment.                                                                                                                                                                                | Fuji apple           | China   | Food Safety Concerns and Consumer Preferences for Food Safety Attributes: Evidence from China                                          | 2020 |
| Traceability             | Most respondents are willing to pay a premium for the fish products traceability program to increase safety. The average premium price for respondents was 6%.                                                                                                              | fishing products     | China   | Consumers' perception toward quality and safety of fishery products, Beijing, China                                                    | 2009 |
|                          | The willingness to pay a premium amount for certified traceable food is limited.                                                                                                                                                                                            | food traceability    | China   | Factors Affecting Consumer Willingness to Pay for Certified Traceable Food in Jiangsu Province of China                                | 2021 |
|                          | The perception of quality and safety is not a consequence of the traceability of grape foods in the consumers' perception                                                                                                                                                   | grape products       | China   | Consumers' perceptions of quality and safety for grape products: A case study in Zhejiang Province, China                              | 2012 |
| Eating habits and health | The frequency of cooking, cleaning of cutting tools and cutting boards, and the storage time of food at room                                                                                                                                                                | foodborne disease    | China   | Consumer's risk perception of Foodborne diseases and high-risk                                                                         | 2019 |

|                                                                                                                                                                                                          |                         |        |                                                                                                                                                                        |  |
|----------------------------------------------------------------------------------------------------------------------------------------------------------------------------------------------------------|-------------------------|--------|------------------------------------------------------------------------------------------------------------------------------------------------------------------------|--|
| temperature was independent of the risk perception of Foodborne disease                                                                                                                                  |                         |        | food safety practices in domestic kitchens                                                                                                                             |  |
| Consumers with good hygiene and eating habits have a higher perception of risk for Foodborne disease                                                                                                     | foodborne disease       | China  | Consumer's risk perception of 2019 Foodborne diseases and high-risk food safety practices in domestic kitchens                                                         |  |
| Most consumers return or discard the product and complain to the competent body.                                                                                                                         | fishing products        | China  | Consumers' perception toward 2009 quality and safety of fishery products, Beijing, China                                                                               |  |
| Most interviewees stated that they adopted some hygienic practice when handling seafood (washing hands with soap; the majority claimed to separate raw foods from ready-to-eat foods)                    | Seafood                 | Brazil | Consumption, knowledge, and food 2020 safety practices of Brazilian seafood consumers Consumption, knowledge, and food safety practices of Brazilian seafood consumers |  |
| The reliability of consumers' attitudes towards food safety practices is high                                                                                                                            | Milk and dairy products | India  | Customer's Decisiveness About 2019 Food Safety Apprehensions of Dairy Products: A Consumer-Centric Approach                                                            |  |
| Personality (including personal handling habits, laziness, and past experiences) directly affects self-protective behavior and moderates the effects of knowledge and awareness on behavior.             | foodborne disease       | China  | Determinants of consumer food 2020 safety self-protection behavior-- an analysis using grounded theory                                                                 |  |
| The thawing of chicken meat, the time and temperature of egg cooking and the yolk point are the main procedures responsible for raising the level of WHOPI (Weighted Harmonic Outbreak Prevention Index) | chickens and eggs       | Brazil | Food safety behavior and handling 2019 practices during purchase, preparation, storage and consumption of chicken meat and eggs                                        |  |
| Most respondents had an average level of good hygiene practices procedures                                                                                                                               | chickens and eggs       | Brazil | Food safety behavior and handling 2019 practices during purchase, preparation, storage and consumption of chicken meat and eggs                                        |  |
| Chinese consumers prefer to assess the level of safety of a restaurant's food based on the "sensory perception of the food" and the "restaurant environment"                                             | Restaurants             | China  | Food safety in restaurants: The 2019 consumer perspective                                                                                                              |  |
| The way to understand whether a food is safe is by looking for signs that the food is fresh and by looking for                                                                                           | Perception about food   | China  | Food safety in urban China: 2017 Perceptions and coping strategies of residents in Nanjing                                                                             |  |

|                                                               |                                                                                                                                                 |                                          |              |                                                                                                                                                     |      |
|---------------------------------------------------------------|-------------------------------------------------------------------------------------------------------------------------------------------------|------------------------------------------|--------------|-----------------------------------------------------------------------------------------------------------------------------------------------------|------|
|                                                               | information on which synthetic safety products were or were not used to produce that food.                                                      |                                          |              |                                                                                                                                                     |      |
|                                                               | Most preferred the pork to be well cooked (well done). They indicated that the main reason for cooking “well done” is that it killed the germs. | Biological contamination (Taenia solium) | South Africa | Consumer knowledge and practices for pork safety in two Taenia solium cysticercosis endemic districts in Eastern Cape Province of South Africa      | 2020 |
| <b>Place of consumption / purchase / physical environment</b> | For the consumer, the probability of having a Foodborne disease is greater in another restaurant than in the current restaurant.                | foodborne disease                        | Brazil       | Consumer risk perceptions concerning different consequences of Foodborne disease acquired from food consumed away from home: A case study in Brazil | 2022 |
|                                                               | Consumers underestimate the risk of foodborne disease when eating out                                                                           | foodborne disease                        | Brazil       | Consumer risk perceptions concerning different consequences of Foodborne disease acquired from food consumed away from home: A case study in Brazil | 2022 |
|                                                               | Consumers realize that the risks of dining at the current establishment are similar to those posed by dining in their own homes                 | foodborne disease                        | Brazil       | Consumer risk perceptions concerning different consequences of Foodborne disease acquired from food consumed away from home: A case study in Brazil | 2022 |
|                                                               | Different types of restaurants lead to a shift in consumers' perception of risk                                                                 | foodborne disease                        | Brazil       | Consumer risk perceptions concerning different consequences of Foodborne disease acquired from food consumed away from home: A case study in Brazil | 2022 |
|                                                               | Consumers prefer to buy meat at upper-class retailers and believe that this point sells safer meats                                             | foodborne disease in meat                | South Africa | Consumers' Social Representations of Meat Safety in Two Selected Restaurants of Raymond Mhlaba Municipality in the Eastern Cape, South Africa       | 2017 |
|                                                               | The lack of structure in the environments (presence of a refrigerator, running water...) restricts self-protection behaviors                    | foodborne disease                        | China        | Determinants of consumer food safety self-protection behavior-- an analysis using grounded theory                                                   | 2020 |
|                                                               | Most have the perception that street foods are partially clean                                                                                  | foodborne disease - street food          | Brazil       | Characterization of street food consumption according to age, multicentric study                                                                    | 2018 |
|                                                               | The hygiene of the place of sale and the freshness of the meat were the most                                                                    | foodborne disease in meat                | South Africa | Consumers' Social Representations of Meat Safety in Two Selected Restaurants of Raymond Mhlaba                                                      | 2017 |

---

important factors for consumers in  
relation to the meat safety assessment

Municipality in the Eastern Cape,  
South Africa
